# Supplementary material for: Brain structure and function link to variation in biobehavioral dimensions across the psychopathological continuum
Source: eLife. 2023 Jun 19;12:e85006. doi: 10.7554/eLife.85006 (PMC10519708; doi:10.7554/eLife.85006)
Supplement: Appendix 1—figure 2—source data 1. [file elife-85006-app1-fig2-data1.xlsx]

## Sheet: Tabelle1
Correlations for IC8
Component (IC)	Behavioral/demographic measure	Spearman correlation coefficient	P-value (FDR corrected)	Spearman partial correlation coefficient	P-value (FDR corrected)
8	Brief-A: self-monitoring	-0.223921	0.00806775	-0.152275	0.0214224
8	BMI	-0.35419	8.95737e-08	-0.212745	0.00223397
8	Heart rate variability during resting-state scan	0.263509	0.000526377	0.00628014	0.929277
8	CBS: number of chronic diseases under treatment	-0.206325	0.0206207	-0.0516368	0.432555
8	Age	-0.565114	9.65193e-23	N/A	N/A
Correlations for IC13
Component (IC)	Behavioral/demographic measure	Spearman correlation coefficient	P-value (FDR corrected)	Spearman partial correlation coefficient	P-value (FDR corrected)
13	Brief-A: self-monitoring	-0.194711	0.0381691	-0.116538	0.074006
13	Brief-A: working memory	-0.216584	0.0118476	-0.159944	0.0161959
13	BMI	-0.293769	4.82821e-05	-0.135172	0.0392257
13	Heart rate variability during resting-state scan	0.230215	0.0057209	-0.0379009	0.546333
13	SF: physical pain	-0.221365	0.00918458	-0.155099	0.0192555
13	Systolic blood pressure	-0.251388	0.00130919	-0.137032	0.037885
13	Diastolic blood pressure	-0.198938	0.0309834	-0.101802	0.119157
13	Age	-0.562424	9.65193e-23	N/A	N/A
Correlations for IC30
Component (IC)	Behavioral/demographic measure	Spearman correlation coefficient	P-value (FDR corrected)	Spearman partial correlation coefficient	P-value (FDR corrected)
30	Brief-A: inhibition	-0.19158	0.0443424	-0.189784	0.00502232
30	Brief-A: self-monitoring	-0.216125	0.0119401	-0.193684	0.00500274
