# Supplementary material for: Brain structure and function link to variation in biobehavioral dimensions across the psychopathological continuum
Source: eLife. 2023 Jun 19;12:e85006. doi: 10.7554/eLife.85006 (PMC10519708; doi:10.7554/eLife.85006)
Supplement: Figure 4—source data 1. [file elife-85006-fig4-data1.xlsx]

## Sheet: Tabelle1
Correlation for IC32
Component (IC)	Behavioral/demographic measure	Spearman correlation coefficient	P-value (FDR corrected)	Spearman partial correlation coefficient	P-value (FDR corrected)
32	Autism spectrum disorder (yes/no)	0.192163	0.0437775	0.173837	0.00940994
