# Supplementary material for: Brain structure and function link to variation in biobehavioral dimensions across the psychopathological continuum
Source: eLife. 2023 Jun 19;12:e85006. doi: 10.7554/eLife.85006 (PMC10519708; doi:10.7554/eLife.85006)
Supplement: Figure 5—source data 1. [file elife-85006-fig5-data1.xlsx]

## Sheet: Tabelle1
Correlations for IC7
Component (IC)	Behavioral/demographic measure	Spearman correlation coefficient	P-value (FDR corrected)	Spearman partial correlation coefficient	P-value (FDR corrected)
7	IDS-SR: anxiety/somatic	-0.226293	0.0070497	-0.164608	0.0144145
7	Brief-A: self-monitoring	-0.205449	0.0215653	-0.130237	0.0458584
7	ASI: physical concerns	-0.195369	0.0370561	-0.176678	0.00854617
7	BMI	-0.360515	4.67228e-08	-0.219355	0.00164018
7	Heart rate variability during resting-state scan	0.316014	5.79625e-06	0.0781816	0.239906
7	WHODAS: mobility	-0.21149	0.0153756	-0.181026	0.0079509
7	WHODAS: life activities	-0.195775	0.0365616	-0.150092	0.0230605
7	SF: physical functioning	0.228245	0.00635295	0.077886	0.239906
7	SF: experienced health	0.199984	0.0293255	0.134963	0.0392257
7	SF: physical pain	-0.21601	0.0119401	-0.144861	0.0288222
7	Age	-0.559911	9.65193e-23	N/A	N/A
Correlation for IC15
Component (IC)	Behavioral/demographic measure	Spearman correlation coefficient	P-value (FDR corrected)	Spearman partial correlation coefficient	P-value (FDR corrected)
15	ASI: mental incapacitation concerns	-0.217763	0.0114714	-0.203224	0.00330407
