# Supplementary material for: Brain structure and function link to variation in biobehavioral dimensions across the psychopathological continuum
Source: eLife. 2023 Jun 19;12:e85006. doi: 10.7554/eLife.85006 (PMC10519708; doi:10.7554/eLife.85006)
Supplement: Supplementary file 1. [file elife-85006-supp1.xlsx]

## Sheet: File 1
Supplementary File 1. Spearman correlations between biobehavioral measures of interest
		IDS-SR: mood/cognition	IDS-SR: anxiety/somatic	IDS-SR: sleep	ASI: physical concerns	ASI: mental incapacitation concerns	ASI: social concerns	CAARS: inattention/memory problems	CAARS: hyperactivity/restlessness	CAARS: impulsivity/emotional lability	CAARS: problems with self-concept	AQ-50: social skill	AQ-50: difficulty with change/attention switching	AQ-50: communication	AQ-50: imagination	AQ-50: attention to detail	TAS-20: describing feelings	TAS-20: difficulty identifying feelings	TAS-20: externally-oriented thinking	PID-5: negative affect	PID-5: detachment	PID-5: antagonism	PID-5: disinhibition	PID-5: psychoticism	PTQ: core characteristics of RNT	PTQ: unproductiveness	PTQ: capturing mental capacity	BRIEF-A: inhibition	BRIEF-A: shift	BRIEF-A: emotional control	BRIEF-A: self-monitor	BRIEF-A: initiate	BRIEF-A: working memory	BRIEF-A: plan/organize	BRIEF-A: organization of materials	BRIEF-A: task monitor	Age	Sex	Level of education	BMI	Systolic blood pressure	Diastolic blood pressure	Heart rate during resting-state scan	Change in heart rate (stress - neutral)	Heart rate variability during resting-state scan	Change in heart rate variability (stress - neutral)	Baseline salivary cortisol	Salivary cortisol after stress induction	Hair cortisol
IDS-SR: mood/cognition	Correlation Coefficient	1	0.751**	0.365**	0.358**	0.656**	0.437**	0.575**	0.478**	0.605**	0.728**	0.549**	0.546**	0.426**	0.331**	0.262**	0.445**	0.656**	0.131*	0.675**	0.668**	0.280**	0.453**	0.567**	0.684**	0.647**	0.655**	0.438**	0.635**	0.626**	0.365**	0.646**	0.656**	0.519**	0.362**	0.452**	0.0881001	-0.0114571	-0.208**	0.150**	0.0104146	0.0110733	0.189**	-0.118*	-0.223**	0.142*	0.00557342	-0.0366986	-0.0542903
	Sig. (2-tailed)		8.32765e-55	1.00716e-10	2.39143e-10	9.90217e-38	3.31182e-15	2.44136e-27	3.2341e-18	8.6221e-31	6.20358e-50	1.18837e-24	2.61388e-24	1.92024e-14	5.4856e-09	5.23517e-06	9.21116e-16	1.24723e-37	0.0240958	1.57766e-40	1.79706e-39	1.03449e-06	2.34651e-16	1.57558e-26	5.58097e-42	2.14217e-36	1.39834e-37	2.85403e-15	1.00354e-34	1.67827e-33	9.89908e-11	3.36582e-36	1.14347e-37	9.27871e-22	1.43109e-10	2.85007e-16	0.131125	0.844646	0.000319096	0.0096453	0.858627	0.849788	0.00114152	0.0421928	0.000108737	0.0149743	0.92406	0.530099	0.352789
IDS-SR: anxiety/somatic	Correlation Coefficient	0.751**	1	0.359**	0.434**	0.580**	0.352**	0.441**	0.441**	0.586**	0.570**	0.448**	0.474**	0.318**	0.313**	0.278**	0.338**	0.613**	0.108973	0.581**	0.509**	0.238**	0.392**	0.499**	0.609**	0.523**	0.573**	0.452**	0.564**	0.585**	0.367**	0.483**	0.590**	0.402**	0.270**	0.375**	0.161**	-0.0923955	-0.218**	0.212**	0.0146475	0.0925645	0.158**	-0.100296	-0.170**	0.143*	-0.0592198	-0.0190668	-0.0862075
	Sig. (2-tailed)	8.32765e-55		2.11995e-10	6.01192e-15	6.17884e-28	4.75726e-10	1.81475e-15	1.76029e-15	1.26638e-28	8.15575e-27	5.33668e-16	6.11777e-18	2.25945e-08	3.92714e-08	1.21728e-06	2.51723e-09	8.30137e-32	0.0615819	5.27076e-28	6.98364e-21	3.61111e-05	2.9814e-12	5.87799e-20	2.33366e-31	4.50908e-22	3.61011e-27	2.71695e-16	3.84858e-26	1.96263e-28	7.38038e-11	1.21816e-18	5.21067e-29	6.77588e-13	2.60395e-06	2.83906e-11	0.0054426	0.113285	0.000162814	0.000238153	0.802182	0.112625	0.006464	0.0854938	0.00336003	0.0137728	0.310723	0.744332	0.139642
IDS-SR: sleep	Correlation Coefficient	0.365**	0.359**	1	0.143*	0.306**	0.214**	0.223**	0.195**	0.283**	0.310**	0.161**	0.134*	0.0529973	0.156**	0.0415831	0.161**	0.263**	-0.033679	0.265**	0.245**	0.0802263	0.172**	0.165**	0.333**	0.311**	0.332**	0.228**	0.276**	0.301**	0.153**	0.208**	0.303**	0.234**	0.189**	0.253**	0.185**	0.0122976	-0.160**	0.103526	0.0184318	-0.0111537	-0.0274332	-0.129*	-0.0729451	0.06509	0.0469732	0.0143101	-0.00349622
	Sig. (2-tailed)	1.00716e-10	2.11995e-10		0.0140239	7.83334e-08	0.000219702	0.00011619	0.000771321	7.85186e-07	5.6049e-08	0.00556485	0.0214306	0.36439	0.00730299	0.476782	0.00551032	4.57951e-06	0.564504	3.88052e-06	2.01715e-05	0.169349	0.0029583	0.00438792	4.71388e-09	4.84353e-08	4.86037e-09	7.56392e-05	1.44328e-06	1.33362e-07	0.00832129	0.000318913	1.07615e-07	5.06653e-05	0.00112591	1.09467e-05	0.00142161	0.83341	0.00582058	0.0758422	0.752564	0.84871	0.638877	0.0265248	0.211585	0.26511	0.421507	0.806648	0.952319
ASI: physical concerns	Correlation Coefficient	0.358**	0.434**	0.143*	1	0.505**	0.352**	0.221**	0.302**	0.360**	0.385**	0.241**	0.292**	0.247**	0.146*	0.217**	0.178**	0.351**	0.0630836	0.408**	0.332**	0.183**	0.222**	0.351**	0.313**	0.298**	0.331**	0.219**	0.310**	0.285**	0.211**	0.174**	0.304**	0.198**	0.134*	0.177**	0.0869408	-0.0439469	-0.171**	0.187**	0.0372296	0.0284704	0.167**	-0.188**	-0.182**	0.188**	-0.0437723	-0.00122039	-0.089866
	Sig. (2-tailed)	2.39143e-10	6.01192e-15	0.0140239		1.72685e-20	4.85409e-10	0.000128503	1.25643e-07	1.96914e-10	7.69817e-12	2.82756e-05	3.45452e-07	1.77285e-05	0.0120128	0.000166774	0.00218479	5.82099e-10	0.280154	2.88968e-13	4.93794e-09	0.00163214	0.000124086	5.50786e-10	4.11757e-08	1.75359e-07	5.52486e-09	0.000146595	5.41878e-08	6.24293e-07	0.000269689	0.00270388	9.97803e-08	0.000618918	0.0212255	0.00230423	0.136293	0.452068	0.00330468	0.00122928	0.52416	0.626246	0.00408783	0.00115389	0.00165711	0.00114983	0.453868	0.983348	0.123545
ASI: mental incapacitation concerns	Correlation Coefficient	0.656**	0.580**	0.306**	0.505**	1	0.552**	0.481**	0.485**	0.604**	0.701**	0.431**	0.466**	0.405**	0.207**	0.291**	0.396**	0.569**	0.0942635	0.645**	0.552**	0.257**	0.402**	0.560**	0.629**	0.556**	0.597**	0.392**	0.533**	0.541**	0.364**	0.439**	0.521**	0.461**	0.305**	0.376**	0.139*	0.0515349	-0.156**	0.214**	0.0856529	0.0527196	0.125*	-0.175**	-0.184**	0.159**	-0.0199894	-0.0295833	-0.0675525
	Sig. (2-tailed)	9.90217e-38	6.17884e-28	7.83334e-08	1.72685e-20		6.03045e-25	1.88381e-18	7.75181e-19	1.1621e-30	7.73558e-45	8.46596e-15	2.70386e-17	4.69202e-13	0.000352845	3.64674e-07	1.56561e-12	1.15856e-26	0.106147	3.84862e-36	6.87219e-25	7.99697e-06	7.38636e-13	8.54527e-26	7.02386e-34	2.51991e-25	7.0936e-30	2.9128e-12	4.85066e-23	7.44465e-24	1.15396e-10	2.57465e-15	5.76285e-22	5.84906e-17	9.44373e-08	2.35919e-11	0.0165484	0.377794	0.00731965	0.000211675	0.142216	0.366912	0.0316939	0.00257751	0.00150563	0.00617577	0.732422	0.612813	0.247416
ASI: social concerns	Correlation Coefficient	0.437**	0.352**	0.214**	0.352**	0.552**	1	0.282**	0.362**	0.442**	0.508**	0.265**	0.312**	0.267**	0.169**	0.243**	0.317**	0.359**	0.0452153	0.464**	0.414**	0.200**	0.344**	0.387**	0.422**	0.365**	0.365**	0.271**	0.390**	0.354**	0.267**	0.230**	0.340**	0.285**	0.176**	0.234**	-0.0585842	-0.071075	-0.0833268	0.0165078	-0.0293593	-0.00266473	0.156**	-0.0561711	-0.052231	0.0896302	-0.0607204	-0.0633536	-0.0599755
	Sig. (2-tailed)	3.31182e-15	4.75726e-10	0.000219702	4.85409e-10	6.03045e-25		8.70499e-07	1.45166e-10	1.50684e-15	9.42813e-21	4.00478e-06	4.54306e-08	3.23304e-06	0.00363059	2.37585e-05	2.60368e-08	2.03501e-10	0.43911	3.52386e-17	1.20953e-13	0.000549467	1.33868e-09	5.26167e-12	3.7135e-14	1.04215e-10	9.77026e-11	2.28538e-06	3.67149e-12	3.78497e-10	3.31362e-06	6.56902e-05	2.1567e-09	6.33311e-07	0.00244413	5.10782e-05	0.315954	0.223563	0.153409	0.777678	0.615506	0.96365	0.00738228	0.336334	0.371376	0.124537	0.298601	0.278097	0.304579
CAARS: inattention/memory problems	Correlation Coefficient	0.575**	0.441**	0.223**	0.221**	0.481**	0.282**	1	0.622**	0.544**	0.627**	0.468**	0.511**	0.465**	0.207**	0.254**	0.413**	0.505**	0.0704278	0.497**	0.530**	0.345**	0.688**	0.603**	0.538**	0.557**	0.617**	0.560**	0.553**	0.460**	0.426**	0.693**	0.678**	0.730**	0.644**	0.700**	0.0341153	0.0692715	-0.167**	0.00911033	0.00673822	0.00577602	0.148*	0.0382036	-0.126*	0.0996083	0.105392	-0.0489536	0.00660469
	Sig. (2-tailed)	2.44136e-27	1.81475e-15	0.00011619	0.000128503	1.88381e-18	8.70499e-07		5.6775e-33	3.89168e-24	1.28112e-33	1.99176e-17	4.68524e-21	3.37548e-17	0.000341891	1.02487e-05	1.46494e-13	1.68407e-20	0.227818	8.4245e-20	9.94064e-23	1.09015e-09	1.06746e-42	1.45409e-30	1.58475e-23	1.74873e-25	2.15901e-32	9.72451e-26	5.18883e-25	7.49827e-17	1.97783e-14	1.59321e-43	5.45626e-41	1.87258e-50	6.91822e-36	9.96681e-45	0.559468	0.235562	0.00407629	0.87618	0.908253	0.921308	0.0108783	0.513356	0.0305443	0.0876707	0.0706809	0.402178	0.910063
CAARS: hyperactivity/restlessness	Correlation Coefficient	0.478**	0.441**	0.195**	0.302**	0.485**	0.362**	0.622**	1	0.585**	0.559**	0.359**	0.418**	0.375**	0.176**	0.283**	0.381**	0.474**	0.147*	0.511**	0.471**	0.450**	0.655**	0.575**	0.483**	0.451**	0.516**	0.639**	0.467**	0.429**	0.450**	0.469**	0.558**	0.517**	0.431**	0.514**	-0.0457559	0.0616152	-0.182**	-0.0310387	-0.044698	-0.0176163	0.0848614	-0.0854419	0.0172917	0.0913437	0.107167	-0.0763551	-0.0533182
	Sig. (2-tailed)	3.2341e-18	1.76029e-15	0.000771321	1.25643e-07	7.75181e-19	1.45166e-10	5.6775e-33		1.61828e-28	1.1912e-25	2.10339e-10	6.96064e-14	2.8176e-11	0.00241392	8.0719e-07	1.26163e-11	6.54311e-18	0.0113546	5.51692e-21	1.10371e-17	4.37952e-16	1.34561e-37	2.10564e-27	1.2547e-18	3.72303e-16	1.83682e-21	3.41454e-35	2.15417e-17	1.3163e-14	4.28225e-16	1.60507e-17	1.44592e-25	1.45763e-21	9.07339e-15	2.81995e-21	0.433652	0.291523	0.00171972	0.595438	0.444369	0.76318	0.145952	0.143205	0.767416	0.117467	0.0660435	0.190947	0.361489
CAARS: impulsivity/emotional lability	Correlation Coefficient	0.605**	0.586**	0.283**	0.360**	0.604**	0.442**	0.544**	0.585**	1	0.620**	0.438**	0.550**	0.461**	0.222**	0.334**	0.332**	0.577**	0.0966271	0.740**	0.497**	0.471**	0.577**	0.642**	0.606**	0.480**	0.582**	0.544**	0.624**	0.732**	0.534**	0.459**	0.640**	0.484**	0.411**	0.468**	0.165**	0.015299	-0.161**	0.163**	-0.0023822	0.0842427	0.110045	-0.0404725	-0.127*	0.0949607	0.0215371	-0.00627221	-0.029873
	Sig. (2-tailed)	8.6221e-31	1.26638e-28	7.85186e-07	1.96914e-10	1.1621e-30	1.50684e-15	3.89168e-24	1.61828e-28		9.93316e-33	2.77499e-15	1.02226e-24	6.3385e-17	0.000116793	3.98711e-09	5.06222e-09	1.52625e-27	0.0976292	2.09205e-52	7.68442e-20	1.16604e-17	1.37085e-27	1.26342e-35	6.03198e-31	2.14496e-18	3.6636e-28	3.98123e-24	3.00814e-33	8.36973e-51	3.45293e-23	8.385e-17	2.31663e-35	1.04587e-18	2.02004e-13	1.69341e-17	0.00455261	0.793577	0.00553378	0.00487415	0.967502	0.148925	0.0590537	0.488642	0.0295633	0.103576	0.712587	0.914573	0.609336
CAARS: problems with self-concept	Correlation Coefficient	0.728**	0.570**	0.310**	0.385**	0.701**	0.508**	0.627**	0.559**	0.620**	1	0.564**	0.578**	0.482**	0.272**	0.329**	0.468**	0.590**	0.0997459	0.739**	0.660**	0.312**	0.484**	0.613**	0.671**	0.651**	0.646**	0.440**	0.632**	0.599**	0.393**	0.567**	0.560**	0.550**	0.372**	0.455**	0.0628522	-0.0104276	-0.139*	0.124*	-0.0231302	0.0417779	0.149*	-0.0527548	-0.152**	0.136*	0.0259968	-0.0435746	-0.0224782
	Sig. (2-tailed)	6.20358e-50	8.15575e-27	5.6049e-08	7.69817e-12	7.73558e-45	9.42813e-21	1.28112e-33	1.1912e-25	9.93316e-33		4.01731e-26	1.22161e-27	1.35727e-18	2.07506e-06	6.72819e-09	1.70381e-17	4.52907e-29	0.0872316	3.43899e-52	3.16327e-38	4.6416e-08	1.0865e-18	7.58133e-32	6.22472e-40	5.26442e-37	2.82127e-36	2.21231e-15	2.72212e-34	4.69564e-30	2.4273e-12	1.74825e-26	1.01063e-25	9.39399e-25	4.24187e-11	1.85039e-16	0.281926	0.858452	0.016807	0.033008	0.69237	0.474718	0.0102951	0.366592	0.00898036	0.0190977	0.656545	0.455912	0.700618
AQ-50: social skill	Correlation Coefficient	0.549**	0.448**	0.161**	0.241**	0.431**	0.265**	0.468**	0.359**	0.438**	0.564**	1	0.726**	0.736**	0.551**	0.369**	0.591**	0.589**	0.244**	0.474**	0.672**	0.148*	0.276**	0.517**	0.558**	0.472**	0.507**	0.266**	0.612**	0.431**	0.355**	0.445**	0.422**	0.367**	0.193**	0.289**	0.0877485	0.0750441	-0.168**	0.141*	0.0810373	0.126*	0.185**	-0.0515465	-0.203**	0.0836827	0.105933	-0.0173807	-0.111253
	Sig. (2-tailed)	1.18837e-24	5.33668e-16	0.00556485	2.82756e-05	8.46596e-15	4.00478e-06	1.99176e-17	2.10339e-10	2.77499e-15	4.01731e-26		1.78558e-49	1.1542e-51	7.15836e-25	6.31173e-11	3.63253e-29	5.81632e-29	2.28345e-05	6.18553e-18	3.51628e-40	0.0106563	1.44269e-06	1.53593e-21	1.3872e-25	9.03184e-18	1.06797e-20	3.64577e-06	1.08152e-31	9.02955e-15	3.61789e-10	9.92183e-16	3.74086e-14	8.07163e-11	0.000841588	4.5314e-07	0.132676	0.1987	0.00380862	0.0151035	0.165065	0.0302544	0.00145847	0.377686	0.000457261	0.151655	0.06924	0.766255	0.0563084
AQ-50: difficulty with change/attention switching	Correlation Coefficient	0.546**	0.474**	0.134*	0.292**	0.466**	0.312**	0.511**	0.418**	0.550**	0.578**	0.726**	1	0.698**	0.514**	0.392**	0.471**	0.587**	0.228**	0.592**	0.578**	0.284**	0.388**	0.546**	0.562**	0.422**	0.567**	0.331**	0.705**	0.533**	0.372**	0.470**	0.544**	0.433**	0.197**	0.369**	0.0730628	0.0305413	-0.142*	0.110131	0.0799995	0.0726899	0.113188	0.0758162	-0.0891932	0.0867618	0.138*	0.0521154	-0.0741554
	Sig. (2-tailed)	2.61388e-24	6.11777e-18	0.0214306	3.45452e-07	2.70386e-17	4.54306e-08	4.68524e-21	6.96064e-14	1.02226e-24	1.22161e-27	1.78558e-49		1.87518e-44	2.59088e-21	2.8733e-12	1.04088e-17	1.00348e-28	7.50171e-05	2.58981e-29	1.07373e-27	6.97718e-07	4.65866e-12	2.28706e-24	5.38575e-26	3.6148e-14	1.55118e-26	5.56198e-09	1.23283e-45	5.22408e-23	4.09132e-11	1.29338e-17	4.26026e-24	6.76189e-15	0.000650945	5.75714e-11	0.210847	0.601351	0.0146898	0.0588539	0.170562	0.213192	0.0521299	0.194106	0.126391	0.137104	0.0180411	0.372437	0.204084
AQ-50: communication	Correlation Coefficient	0.426**	0.318**	0.0529973	0.247**	0.405**	0.267**	0.465**	0.375**	0.461**	0.482**	0.736**	0.698**	1	0.497**	0.401**	0.485**	0.511**	0.244**	0.496**	0.509**	0.278**	0.324**	0.546**	0.444**	0.382**	0.448**	0.366**	0.552**	0.416**	0.452**	0.428**	0.439**	0.410**	0.268**	0.332**	0.0230592	0.088538	-0.110065	0.111746	0.0849946	0.09874	0.110118	0.0180257	-0.118*	0.072343	0.148*	0.0246926	-0.0328777
	Sig. (2-tailed)	1.92024e-14	2.25945e-08	0.36439	1.77285e-05	4.69202e-13	3.23304e-06	3.37548e-17	2.8176e-11	6.3385e-17	1.35727e-18	1.1542e-51	1.87518e-44		8.33028e-20	7.97744e-13	8.2973e-19	5.22941e-21	2.19079e-05	1.0528e-19	6.87693e-21	1.222e-06	1.1703e-08	2.67028e-24	1.07766e-15	1.06933e-11	5.36586e-16	9.13876e-11	6.04193e-25	9.46348e-14	3.1568e-16	1.37988e-14	2.33891e-15	2.16215e-13	3.00868e-06	5.26307e-09	0.693267	0.129213	0.0590073	0.0552177	0.145318	0.0904831	0.0588831	0.757845	0.0423525	0.21539	0.0111497	0.672753	0.573812
AQ-50: imagination	Correlation Coefficient	0.331**	0.313**	0.156**	0.146*	0.207**	0.169**	0.207**	0.176**	0.222**	0.272**	0.551**	0.514**	0.497**	1	0.165**	0.406**	0.378**	0.383**	0.257**	0.390**	0.0720328	0.152**	0.251**	0.244**	0.181**	0.248**	0.152**	0.435**	0.224**	0.275**	0.234**	0.267**	0.168**	0.0176022	0.178**	0.0844148	0.184**	-0.159**	0.140*	0.127*	0.100111	0.161**	-0.0533106	-0.214**	0.04808	0.147*	0.0811763	-0.00941625
	Sig. (2-tailed)	5.4856e-09	3.92714e-08	0.00730299	0.0120128	0.000352845	0.00363059	0.000341891	0.00241392	0.000116793	2.07506e-06	7.15836e-25	2.59088e-21	8.33028e-20		0.00442795	4.15395e-13	1.85177e-11	1.01719e-11	7.62538e-06	3.99363e-12	0.217369	0.00893152	1.2334e-05	2.24392e-05	0.0017686	1.67151e-05	0.00876686	4.80503e-15	0.000101355	1.62232e-06	5.07129e-05	3.24528e-06	0.00384051	0.763363	0.00213499	0.148093	0.00145878	0.00624011	0.0163072	0.0288017	0.0860738	0.00550886	0.361558	0.000214618	0.410638	0.0115488	0.164339	0.872057
AQ-50: attention to detail	Correlation Coefficient	0.262**	0.278**	0.0415831	0.217**	0.291**	0.243**	0.254**	0.283**	0.334**	0.329**	0.369**	0.392**	0.401**	0.165**	1	0.259**	0.368**	-0.0375118	0.367**	0.254**	0.262**	0.255**	0.427**	0.352**	0.239**	0.311**	0.304**	0.374**	0.335**	0.269**	0.246**	0.221**	0.211**	0.106777	0.158**	-0.0842077	-0.0772658	-0.173**	0.126*	-0.0566577	-0.0310206	0.0774392	0.0345427	0.0518213	0.00751075	-0.00978258	-0.0338318	-0.106389
	Sig. (2-tailed)	5.23517e-06	1.21728e-06	0.476782	0.000166774	3.64674e-07	2.37585e-05	1.02487e-05	8.0719e-07	3.98711e-09	6.72819e-09	6.31173e-11	2.8733e-12	7.97744e-13	0.00442795		6.70534e-06	6.97276e-11	0.521018	7.796e-11	9.93264e-06	4.92062e-06	9.15725e-06	1.75251e-14	4.8031e-10	3.28369e-05	4.71483e-08	1.04732e-07	2.97679e-11	3.67457e-09	2.7031e-06	1.98617e-05	0.000132149	0.000255263	0.0670384	0.0065915	0.149094	0.185693	0.00286034	0.0304408	0.332158	0.595653	0.184704	0.554555	0.375145	0.897789	0.867125	0.562739	0.0680445
TAS-20: describing feelings	Correlation Coefficient	0.445**	0.338**	0.161**	0.178**	0.396**	0.317**	0.413**	0.381**	0.332**	0.468**	0.591**	0.471**	0.485**	0.406**	0.259**	1	0.655**	0.405**	0.339**	0.571**	0.203**	0.323**	0.436**	0.534**	0.473**	0.481**	0.365**	0.532**	0.296**	0.388**	0.456**	0.411**	0.376**	0.251**	0.369**	-0.0376536	0.184**	-0.108355	0.0628404	0.0983941	0.0579295	0.125*	-0.024908	-0.0354397	0.0313067	0.0557247	-0.0399777	0.0185908
	Sig. (2-tailed)	9.21116e-16	2.51723e-09	0.00551032	0.00218479	1.56561e-12	2.60368e-08	1.46494e-13	1.26163e-11	5.06222e-09	1.70381e-17	3.63253e-29	1.04088e-17	8.2973e-19	4.15395e-13	6.70534e-06		1.45966e-37	4.8208e-13	2.31377e-09	6.92603e-27	0.000449499	1.37872e-08	3.88573e-15	4.2334e-23	8.20039e-18	1.63238e-18	1.03631e-10	5.93273e-23	2.3338e-07	4.65203e-12	1.53693e-16	1.7792e-13	2.55186e-11	1.32917e-05	6.27004e-11	0.519443	0.00148621	0.0630788	0.282017	0.0916235	0.321402	0.0317804	0.670066	0.544313	0.592264	0.340194	0.493976	0.7505
TAS-20: difficulty identifying feelings	Correlation Coefficient	0.656**	0.613**	0.263**	0.351**	0.569**	0.359**	0.505**	0.474**	0.577**	0.590**	0.589**	0.587**	0.511**	0.378**	0.368**	0.655**	1	0.304**	0.640**	0.596**	0.330**	0.494**	0.608**	0.658**	0.596**	0.654**	0.521**	0.721**	0.625**	0.501**	0.572**	0.623**	0.524**	0.334**	0.451**	0.0468772	-0.0174243	-0.212**	0.135*	0.0113921	0.0328108	0.167**	-0.109133	-0.140*	0.090064	0.103133	0.0103081	-0.0195341
	Sig. (2-tailed)	1.24723e-37	8.30137e-32	4.57951e-06	5.82099e-10	1.15856e-26	2.03501e-10	1.68407e-20	6.54311e-18	1.52625e-27	4.52907e-29	5.81632e-29	1.00348e-28	5.22941e-21	1.85177e-11	6.97276e-11	1.45966e-37		1.03345e-07	2.48532e-35	8.70113e-30	6.31422e-09	1.55779e-19	3.31211e-31	4.97749e-38	9.27183e-30	2.30004e-37	6.10838e-22	1.15032e-48	2.46546e-33	3.82807e-20	4.77587e-27	4.15112e-33	3.59764e-22	4.20612e-09	3.71512e-16	0.422457	0.765685	0.000237928	0.0201602	0.845517	0.574591	0.0039871	0.0611992	0.0160804	0.122716	0.0769662	0.860058	0.738292
TAS-20: externally-oriented thinking	Correlation Coefficient	0.131*	0.108973	-0.033679	0.0630836	0.0942635	0.0452153	0.0704278	0.147*	0.0966271	0.0997459	0.244**	0.228**	0.244**	0.383**	-0.0375118	0.405**	0.304**	1	0.0869382	0.223**	0.0441825	0.152**	0.137*	0.0694174	0.123*	0.141*	0.165**	0.204**	0.0967291	0.235**	0.0908572	0.136*	0.0722239	-0.0396454	0.123*	0.06701	0.149*	-0.159**	0.112599	0.132*	0.0553087	0.0724152	-0.0130427	-0.0657661	0.0420206	0.140*	0.0735722	0.034687
	Sig. (2-tailed)	0.0240958	0.0615819	0.564504	0.280154	0.106147	0.43911	0.227818	0.0113546	0.0976292	0.0872316	2.28345e-05	7.50171e-05	2.19079e-05	1.01719e-11	0.521018	4.8208e-13	1.03345e-07		0.136304	0.000108619	0.449645	0.00883948	0.0189758	0.234575	0.0349554	0.0151452	0.00457264	0.000431229	0.0972742	4.52879e-05	0.119442	0.0198398	0.216148	0.497577	0.0351685	0.251242	0.0104725	0.00612109	0.053374	0.0231003	0.343817	0.214931	0.823478	0.260168	0.472152	0.0158058	0.207674	0.552902
PID-5: negative affect	Correlation Coefficient	0.675**	0.581**	0.265**	0.408**	0.645**	0.464**	0.497**	0.511**	0.740**	0.739**	0.474**	0.592**	0.496**	0.257**	0.367**	0.339**	0.640**	0.0869382	1	0.591**	0.440**	0.508**	0.669**	0.655**	0.588**	0.628**	0.477**	0.685**	0.765**	0.446**	0.514**	0.566**	0.478**	0.352**	0.443**	0.0581198	-0.106382	-0.169**	0.112175	-0.10834	-0.0207981	0.130*	-0.0578524	-0.112694	0.125*	0.0622147	0.0407915	-0.0381862
	Sig. (2-tailed)	1.57766e-40	5.27076e-28	3.88052e-06	2.88968e-13	3.84862e-36	3.52386e-17	8.4245e-20	5.51692e-21	2.09205e-52	3.43899e-52	6.18553e-18	2.58981e-29	1.0528e-19	7.62538e-06	7.796e-11	2.31377e-09	2.48532e-35	0.136304		3.28718e-29	1.98728e-15	8.75209e-21	1.10408e-39	1.61407e-37	8.27395e-29	8.99323e-34	3.79931e-18	3.46084e-42	5.94184e-58	7.41546e-16	2.57258e-21	2.39081e-26	2.76257e-18	4.93971e-10	1.31078e-15	0.319813	0.0680624	0.00364445	0.0542829	0.0631162	0.722034	0.0261018	0.322048	0.0531712	0.0313884	0.286845	0.485219	0.513548
PID-5: detachment	Correlation Coefficient	0.668**	0.509**	0.245**	0.332**	0.552**	0.414**	0.530**	0.471**	0.497**	0.660**	0.672**	0.578**	0.509**	0.390**	0.254**	0.571**	0.596**	0.223**	0.591**	1	0.278**	0.408**	0.611**	0.589**	0.549**	0.549**	0.359**	0.615**	0.459**	0.378**	0.552**	0.486**	0.435**	0.264**	0.392**	0.0571287	0.158**	-0.205**	0.110025	0.0830846	0.0846181	0.186**	-0.0773193	-0.171**	0.144*	0.0891722	-0.0204059	-0.0559381
	Sig. (2-tailed)	1.79706e-39	6.98364e-21	2.01715e-05	4.93794e-09	6.87219e-25	1.20953e-13	9.94064e-23	1.10371e-17	7.68442e-20	3.16327e-38	3.51628e-40	1.07373e-27	6.87693e-21	3.99363e-12	9.93264e-06	6.92603e-27	8.70113e-30	0.000108619	3.28718e-29		1.21865e-06	2.80695e-13	1.30411e-31	5.58133e-29	1.25871e-24	1.34087e-24	2.19948e-10	4.70413e-32	8.44695e-17	1.89102e-11	6.94512e-25	6.85284e-19	4.43836e-15	4.20537e-06	2.95495e-12	0.328148	0.00638592	0.000382991	0.0590983	0.154612	0.147116	0.00133612	0.185388	0.00319723	0.0135856	0.126481	0.727066	0.338346
PID-5: antagonism	Correlation Coefficient	0.280**	0.238**	0.0802263	0.183**	0.257**	0.200**	0.345**	0.450**	0.471**	0.312**	0.148*	0.284**	0.278**	0.0720328	0.262**	0.203**	0.330**	0.0441825	0.440**	0.278**	1	0.488**	0.454**	0.277**	0.272**	0.314**	0.473**	0.343**	0.363**	0.410**	0.351**	0.350**	0.355**	0.341**	0.337**	-0.0167928	0.130*	-0.0615777	0.107941	-0.0687784	0.0122727	0.0612223	-0.120*	0.0145565	0.0258628	0.0470905	-0.0363609	0.0150579
	Sig. (2-tailed)	1.03449e-06	3.61111e-05	0.169349	0.00163214	7.99697e-06	0.000549467	1.09015e-09	4.37952e-16	1.16604e-17	4.6416e-08	0.0106563	6.97718e-07	1.222e-06	0.217369	4.92062e-06	0.000449499	6.31422e-09	0.449645	1.98728e-15	1.21865e-06		4.40471e-19	2.04904e-16	1.37219e-06	2.19815e-06	3.42303e-08	7.11468e-18	1.50316e-09	1.22663e-10	2.29277e-13	5.78249e-10	6.44259e-10	3.56006e-10	1.90007e-09	2.75359e-09	0.773943	0.0251495	0.291817	0.0640996	0.238921	0.833744	0.294617	0.0388541	0.803386	0.658202	0.420347	0.533893	0.796758
PID-5: disinhibition	Correlation Coefficient	0.453**	0.392**	0.172**	0.222**	0.402**	0.344**	0.688**	0.655**	0.577**	0.484**	0.276**	0.388**	0.324**	0.152**	0.255**	0.323**	0.494**	0.152**	0.508**	0.408**	0.488**	1	0.621**	0.414**	0.452**	0.501**	0.665**	0.458**	0.478**	0.522**	0.500**	0.584**	0.619**	0.533**	0.576**	0.00107348	0.106499	-0.221**	0.0798853	-0.036592	-0.0499416	0.105549	0.048873	-0.00943766	0.0425857	0.0622889	-0.0842618	-0.0797401
	Sig. (2-tailed)	2.34651e-16	2.9814e-12	0.0029583	0.000124086	7.38636e-13	1.33868e-09	1.06746e-42	1.34561e-37	1.37085e-27	1.0865e-18	1.44269e-06	4.65866e-12	1.1703e-08	0.00893152	9.15725e-06	1.37872e-08	1.55779e-19	0.00883948	8.75209e-21	2.80695e-13	4.40471e-19		7.58106e-33	1.25861e-13	3.0235e-16	3.85704e-20	4.76659e-39	1.03023e-16	2.9943e-18	5.63303e-22	4.50718e-20	2.25128e-28	1.33952e-32	5.03798e-23	1.59318e-27	0.985352	0.0677588	0.00013187	0.171175	0.531295	0.392736	0.0702601	0.402954	0.871768	0.466211	0.28627	0.148832	0.171957
PID-5: psychoticism	Correlation Coefficient	0.567**	0.499**	0.165**	0.351**	0.560**	0.387**	0.603**	0.575**	0.642**	0.613**	0.517**	0.546**	0.546**	0.251**	0.427**	0.436**	0.608**	0.137*	0.669**	0.611**	0.454**	0.621**	1	0.569**	0.483**	0.558**	0.518**	0.562**	0.565**	0.512**	0.485**	0.578**	0.494**	0.412**	0.449**	0.0125856	0.0701496	-0.215**	0.149*	-0.0516491	0.000789083	0.135*	-0.0270455	-0.0890172	0.118*	0.0787762	-0.0246868	-0.0704808
	Sig. (2-tailed)	1.57558e-26	5.87799e-20	0.00438792	5.50786e-10	8.54527e-26	5.26167e-12	1.45409e-30	2.10564e-27	1.26342e-35	7.58133e-32	1.53593e-21	2.28706e-24	2.67028e-24	1.2334e-05	1.75251e-14	3.88573e-15	3.31211e-31	0.0189758	1.10408e-39	1.30411e-31	2.04904e-16	7.58106e-33		1.11276e-26	1.16703e-18	1.49543e-25	1.26075e-21	6.29353e-26	2.54517e-26	4.0813e-21	8.67934e-19	1.11504e-27	1.62811e-19	1.72768e-13	5.2066e-16	0.829568	0.229665	0.000202671	0.0103561	0.376736	0.989233	0.0201519	0.643627	0.127145	0.0428519	0.177215	0.672825	0.227467
PTQ: core characteristics of RNT	Correlation Coefficient	0.684**	0.609**	0.333**	0.313**	0.629**	0.422**	0.538**	0.483**	0.606**	0.671**	0.558**	0.562**	0.444**	0.244**	0.352**	0.534**	0.658**	0.0694174	0.655**	0.589**	0.277**	0.414**	0.569**	1	0.773**	0.823**	0.467**	0.714**	0.629**	0.431**	0.583**	0.622**	0.531**	0.397**	0.456**	0.0527566	-0.0144806	-0.180**	0.0995925	0.0344209	0.0361783	0.109637	-0.0732702	-0.143*	0.100881	0.045468	-0.0321801	-0.021291
	Sig. (2-tailed)	5.58097e-42	2.33366e-31	4.71388e-09	4.11757e-08	7.02386e-34	3.7135e-14	1.58475e-23	1.2547e-18	6.03198e-31	6.22472e-40	1.3872e-25	5.38575e-26	1.07766e-15	2.24392e-05	4.8031e-10	4.2334e-23	4.97749e-38	0.234575	1.61407e-37	5.58133e-29	1.37219e-06	1.25861e-13	1.11276e-26		8.52268e-60	5.28925e-74	2.15878e-17	3.50923e-47	7.45108e-34	9.69328e-15	2.86898e-28	6.24663e-33	6.85351e-23	1.45964e-12	1.41027e-16	0.366576	0.80439	0.00190879	0.0877211	0.555953	0.535951	0.060006	0.209551	0.0136679	0.0836762	0.436554	0.581972	0.715729
PTQ: unproductiveness	Correlation Coefficient	0.647**	0.523**	0.311**	0.298**	0.556**	0.365**	0.557**	0.451**	0.480**	0.651**	0.472**	0.422**	0.382**	0.181**	0.239**	0.473**	0.596**	0.123*	0.588**	0.549**	0.272**	0.452**	0.483**	0.773**	1	0.728**	0.449**	0.640**	0.550**	0.364**	0.638**	0.565**	0.582**	0.451**	0.467**	0.0620112	0.0122427	-0.111417	0.108521	0.0359082	-0.00237087	0.122*	-0.0826371	-0.158**	0.0835833	0.137*	-0.0454464	-0.0459319
	Sig. (2-tailed)	2.14217e-36	4.50908e-22	4.84353e-08	1.75359e-07	2.51991e-25	1.04215e-10	1.74873e-25	3.72303e-16	2.14496e-18	5.26442e-37	9.03184e-18	3.6148e-14	1.06933e-11	0.0017686	3.28369e-05	8.20039e-18	9.27183e-30	0.0349554	8.27395e-29	1.25871e-24	2.19815e-06	3.0235e-16	1.16703e-18	8.52268e-60		6.22101e-50	4.47822e-16	2.08766e-35	9.28477e-25	1.18638e-10	4.13179e-35	2.5298e-26	3.62831e-28	3.23414e-16	2.04091e-17	0.288428	0.834144	0.0559433	0.0626749	0.539002	0.967656	0.0358734	0.156853	0.00660447	0.152143	0.0186224	0.436772	0.431884
PTQ: capturing mental capacity	Correlation Coefficient	0.655**	0.573**	0.332**	0.331**	0.597**	0.365**	0.617**	0.516**	0.582**	0.646**	0.507**	0.567**	0.448**	0.248**	0.311**	0.481**	0.654**	0.141*	0.628**	0.549**	0.314**	0.501**	0.558**	0.823**	0.728**	1	0.525**	0.705**	0.628**	0.442**	0.615**	0.661**	0.595**	0.425**	0.511**	0.109225	0.0422245	-0.250**	0.103097	0.0488616	0.0515349	0.134*	-0.100664	-0.184**	0.134*	0.111914	0.0874677	-0.0589808
	Sig. (2-tailed)	1.39834e-37	3.61011e-27	4.86037e-09	5.52486e-09	7.0936e-30	9.77026e-11	2.15901e-32	1.83682e-21	3.6636e-28	2.82127e-36	1.06797e-20	1.55118e-26	5.36586e-16	1.67151e-05	4.71483e-08	1.63238e-18	2.30004e-37	0.0151452	8.99323e-34	1.34087e-24	3.42303e-08	3.85704e-20	1.49543e-25	5.28925e-74	6.22101e-50		2.6497e-22	1.37593e-45	8.58331e-34	1.45813e-15	4.06057e-32	2.10759e-38	1.36797e-29	2.30186e-14	4.60609e-21	0.0609792	0.470004	1.35977e-05	0.0770713	0.403064	0.377794	0.0211049	0.0843467	0.00149998	0.0217589	0.0548508	0.133925	0.312684
BRIEF-A: inhibition	Correlation Coefficient	0.438**	0.452**	0.228**	0.219**	0.392**	0.271**	0.560**	0.639**	0.544**	0.440**	0.266**	0.331**	0.366**	0.152**	0.304**	0.365**	0.521**	0.165**	0.477**	0.359**	0.473**	0.665**	0.518**	0.467**	0.449**	0.525**	1	0.490**	0.571**	0.691**	0.539**	0.681**	0.639**	0.581**	0.658**	0.015473	0.0482708	-0.310**	0.0664035	-0.0346497	-0.0228038	0.0543637	-0.101195	0.00305131	0.0492453	0.053778	-0.0360639	0.0302196
	Sig. (2-tailed)	2.85403e-15	2.71695e-16	7.56392e-05	0.000146595	2.9128e-12	2.28538e-06	9.72451e-26	3.41454e-35	3.98123e-24	2.21231e-15	3.64577e-06	5.56198e-09	9.13876e-11	0.00876686	1.04732e-07	1.03631e-10	6.10838e-22	0.00457264	3.79931e-18	2.19948e-10	7.11468e-18	4.76659e-39	1.26075e-21	2.15878e-17	4.47822e-16	2.6497e-22		3.14487e-19	6.89853e-27	3.13598e-43	1.18951e-23	1.37932e-41	3.15406e-35	5.03653e-28	4.79136e-38	0.791282	0.408782	5.72618e-08	0.255568	0.553329	0.696495	0.352138	0.082712	0.958381	0.399376	0.357357	0.537242	0.605188
BRIEF-A: shift	Correlation Coefficient	0.635**	0.564**	0.276**	0.310**	0.533**	0.390**	0.553**	0.467**	0.624**	0.632**	0.612**	0.705**	0.552**	0.435**	0.374**	0.532**	0.721**	0.204**	0.685**	0.615**	0.343**	0.458**	0.562**	0.714**	0.640**	0.705**	0.490**	1	0.678**	0.535**	0.668**	0.684**	0.601**	0.383**	0.504**	0.0555735	-0.0151396	-0.192**	0.124*	0.000501128	0.0540978	0.136*	-0.067046	-0.197**	0.116*	0.061784	-0.0133612	-0.0329643
	Sig. (2-tailed)	1.00354e-34	3.84858e-26	1.44328e-06	5.41878e-08	4.85066e-23	3.67149e-12	5.18883e-25	2.15417e-17	3.00814e-33	2.72212e-34	1.08152e-31	1.23283e-45	6.04193e-25	4.80503e-15	2.97679e-11	5.93273e-23	1.15032e-48	0.000431229	3.46084e-42	4.70413e-32	1.50316e-09	1.03023e-16	6.29353e-26	3.50923e-47	2.08766e-35	1.37593e-45	3.14487e-19		4.2418e-41	2.73101e-23	1.7747e-39	5.53664e-42	2.3773e-30	9.89585e-12	1.97477e-20	0.341509	0.795681	0.000901797	0.0334232	0.993162	0.354501	0.019256	0.250987	0.000677931	0.0460396	0.290201	0.81924	0.572802
BRIEF-A: emotional control	Correlation Coefficient	0.626**	0.585**	0.301**	0.285**	0.541**	0.354**	0.460**	0.429**	0.732**	0.599**	0.431**	0.533**	0.416**	0.224**	0.335**	0.296**	0.625**	0.0967291	0.765**	0.459**	0.363**	0.478**	0.565**	0.629**	0.550**	0.628**	0.571**	0.678**	1	0.578**	0.480**	0.621**	0.467**	0.393**	0.464**	0.161**	-0.130*	-0.175**	0.177**	-0.078889	0.0403548	0.142*	-0.0348576	-0.162**	0.118*	0.0488003	-0.0275521	-0.0317519
	Sig. (2-tailed)	1.67827e-33	1.96263e-28	1.33362e-07	6.24293e-07	7.44465e-24	3.78497e-10	7.49827e-17	1.3163e-14	8.36973e-51	4.69564e-30	9.02955e-15	5.22408e-23	9.46348e-14	0.000101355	3.67457e-09	2.3338e-07	2.46546e-33	0.0972742	5.94184e-58	8.44695e-17	1.22663e-10	2.9943e-18	2.54517e-26	7.45108e-34	9.28477e-25	8.58331e-34	6.89853e-27	4.2418e-41		1.10993e-27	2.12371e-18	8.60387e-33	2.25322e-17	2.30623e-12	3.59181e-17	0.00564343	0.0255555	0.00260741	0.00227522	0.176594	0.489908	0.0147724	0.550949	0.00535806	0.0424585	0.403654	0.637424	0.587007
BRIEF-A: self-monitor	Correlation Coefficient	0.365**	0.367**	0.153**	0.211**	0.364**	0.267**	0.426**	0.450**	0.534**	0.393**	0.355**	0.372**	0.452**	0.275**	0.269**	0.388**	0.501**	0.235**	0.446**	0.378**	0.410**	0.522**	0.512**	0.431**	0.364**	0.442**	0.691**	0.535**	0.578**	1	0.428**	0.566**	0.474**	0.431**	0.542**	0.177**	0.0352586	-0.150*	0.177**	0.0333502	0.0972708	0.0835532	-0.110901	-0.113422	0.105241	-0.0031756	-0.0748009	-0.0025545
	Sig. (2-tailed)	9.89908e-11	7.38038e-11	0.00832129	0.000269689	1.15396e-10	3.31362e-06	1.97783e-14	4.28225e-16	3.45293e-23	2.4273e-12	3.61789e-10	4.09132e-11	3.1568e-16	1.62232e-06	2.7031e-06	4.65203e-12	3.82807e-20	4.52879e-05	7.41546e-16	1.89102e-11	2.29277e-13	5.63303e-22	4.0813e-21	9.69328e-15	1.18638e-10	1.45813e-15	3.13598e-43	2.73101e-23	1.10993e-27		1.47683e-14	2.42336e-26	6.22541e-18	9.21496e-15	5.98674e-24	0.00221634	0.546373	0.0100913	0.00221693	0.568315	0.0954061	0.152291	0.0570952	0.0516419	0.0710884	0.956687	0.200163	0.965153
BRIEF-A: initiate	Correlation Coefficient	0.646**	0.483**	0.208**	0.174**	0.439**	0.230**	0.693**	0.469**	0.459**	0.567**	0.445**	0.470**	0.428**	0.234**	0.246**	0.456**	0.572**	0.0908572	0.514**	0.552**	0.351**	0.500**	0.485**	0.583**	0.638**	0.615**	0.539**	0.668**	0.480**	0.428**	1	0.714**	0.772**	0.595**	0.636**	-0.0505716	0.0815011	-0.171**	0.0369888	0.021383	0.0685136	0.108663	0.0117824	-0.124*	0.0823685	0.0254932	-0.0906308	-0.0169277
	Sig. (2-tailed)	3.36582e-36	1.21816e-18	0.000318913	0.00270388	2.57465e-15	6.56902e-05	1.59321e-43	1.60507e-17	8.385e-17	1.74825e-26	9.92183e-16	1.29338e-17	1.37988e-14	5.07129e-05	1.98617e-05	1.53693e-16	4.77587e-27	0.119442	2.57258e-21	6.94512e-25	5.78249e-10	4.50718e-20	8.67934e-19	2.86898e-28	4.13179e-35	4.06057e-32	1.18951e-23	1.7747e-39	2.12371e-18	1.47683e-14		2.38505e-47	1.69054e-59	1.15454e-29	8.56936e-35	0.386785	0.162652	0.00326449	0.52685	0.714553	0.240738	0.0623283	0.840295	0.0326497	0.15821	0.662785	0.12037	0.772176
BRIEF-A: working memory	Correlation Coefficient	0.656**	0.590**	0.303**	0.304**	0.521**	0.340**	0.678**	0.558**	0.640**	0.560**	0.422**	0.544**	0.439**	0.267**	0.221**	0.411**	0.623**	0.136*	0.566**	0.486**	0.350**	0.584**	0.578**	0.622**	0.565**	0.661**	0.681**	0.684**	0.621**	0.566**	0.714**	1	0.744**	0.608**	0.726**	0.156**	-0.00495496	-0.195**	0.137*	0.0719591	0.102268	0.0667885	-0.0714188	-0.184**	0.132*	-0.00807105	-0.0505886	-0.00118157
	Sig. (2-tailed)	1.14347e-37	5.21067e-29	1.07615e-07	9.97803e-08	5.76285e-22	2.1567e-09	5.45626e-41	1.44592e-25	2.31663e-35	1.01063e-25	3.74086e-14	4.26026e-24	2.33891e-15	3.24528e-06	0.000132149	1.7792e-13	4.15112e-33	0.0198398	2.39081e-26	6.85284e-19	6.44259e-10	2.25128e-28	1.11504e-27	6.24663e-33	2.5298e-26	2.10759e-38	1.37932e-41	5.53664e-42	8.60387e-33	2.42336e-26	2.38505e-47		3.81867e-53	3.05667e-31	1.27732e-49	0.00744754	0.932465	0.000757003	0.0188641	0.217841	0.0794904	0.252816	0.221325	0.00146964	0.0233325	0.89021	0.386626	0.983877
BRIEF-A: plan/organize	Correlation Coefficient	0.519**	0.402**	0.234**	0.198**	0.461**	0.285**	0.730**	0.517**	0.484**	0.550**	0.367**	0.433**	0.410**	0.168**	0.211**	0.376**	0.524**	0.0722239	0.478**	0.435**	0.355**	0.619**	0.494**	0.531**	0.582**	0.595**	0.639**	0.601**	0.467**	0.474**	0.772**	0.744**	1	0.716**	0.768**	0.0328392	0.126*	-0.188**	-0.00204909	0.0332304	-0.014315	0.0536782	-0.0248727	-0.106192	0.0921256	0.017033	-0.126*	-0.0438597
	Sig. (2-tailed)	9.27871e-22	6.77588e-13	5.06653e-05	0.000618918	5.84906e-17	6.33311e-07	1.87258e-50	1.45763e-21	1.04587e-18	9.39399e-25	8.07163e-11	6.76189e-15	2.16215e-13	0.00384051	0.000255263	2.55186e-11	3.59764e-22	0.216148	2.76257e-18	4.43836e-15	3.56006e-10	1.33952e-32	1.62811e-19	6.85351e-23	3.62831e-28	1.36797e-29	3.15406e-35	2.3773e-30	2.25322e-17	6.22541e-18	1.69054e-59	3.81867e-53		1.0092e-47	1.36747e-58	0.57426	0.0302696	0.00114336	0.972044	0.569706	0.806582	0.358251	0.670506	0.0685598	0.114347	0.770799	0.0306132	0.452967
BRIEF-A: organization of materials	Correlation Coefficient	0.362**	0.270**	0.189**	0.134*	0.305**	0.176**	0.644**	0.431**	0.411**	0.372**	0.193**	0.197**	0.268**	0.0176022	0.106777	0.251**	0.334**	-0.0396454	0.352**	0.264**	0.341**	0.533**	0.412**	0.397**	0.451**	0.425**	0.581**	0.383**	0.393**	0.431**	0.595**	0.608**	0.716**	1	0.705**	0.0495936	0.0189684	-0.103313	0.0689043	0.0245573	0.0125558	0.033885	-0.0707651	-0.0270544	0.0789925	-0.00970706	-0.131*	0.0359023
	Sig. (2-tailed)	1.43109e-10	2.60395e-06	0.00112591	0.0212255	9.44373e-08	0.00244413	6.91822e-36	9.07339e-15	2.02004e-13	4.24187e-11	0.000841588	0.000650945	3.00868e-06	0.763363	0.0670384	1.32917e-05	4.20612e-09	0.497577	4.93971e-10	4.20537e-06	1.90007e-09	5.03798e-23	1.72768e-13	1.45964e-12	3.23414e-16	2.30186e-14	5.03653e-28	9.89585e-12	2.30623e-12	9.21496e-15	1.15454e-29	3.05667e-31	1.0092e-47		1.12766e-45	0.396046	0.745606	0.0764486	0.238061	0.674443	0.829966	0.562124	0.225593	0.643518	0.176025	0.868141	0.0243063	0.539069
BRIEF-A: task monitor	Correlation Coefficient	0.452**	0.375**	0.253**	0.177**	0.376**	0.234**	0.700**	0.514**	0.468**	0.455**	0.289**	0.369**	0.332**	0.178**	0.158**	0.369**	0.451**	0.123*	0.443**	0.392**	0.337**	0.576**	0.449**	0.456**	0.467**	0.511**	0.658**	0.504**	0.464**	0.542**	0.636**	0.726**	0.768**	0.705**	1	0.0684253	0.0883725	-0.127*	0.0555936	0.0439654	0.0154505	0.0230338	-0.0284597	-0.0634996	0.0857453	-0.00213753	-0.110622	0.06924
	Sig. (2-tailed)	2.85007e-16	2.83906e-11	1.09467e-05	0.00230423	2.35919e-11	5.10782e-05	9.96681e-45	2.81995e-21	1.69341e-17	1.85039e-16	4.5314e-07	5.75714e-11	5.26307e-09	0.00213499	0.0065915	6.27004e-11	3.71512e-16	0.0351685	1.31078e-15	2.95495e-12	2.75359e-09	1.59318e-27	5.2066e-16	1.41027e-16	2.04091e-17	4.60609e-21	4.79136e-38	1.97477e-20	3.59181e-17	5.98674e-24	8.56936e-35	1.27732e-49	1.36747e-58	1.12766e-45		0.241347	0.129933	0.0290812	0.341333	0.451878	0.791579	0.693588	0.626376	0.276989	0.141784	0.970838	0.0577273	0.235776
Age	Correlation Coefficient	0.0881001	0.161**	0.185**	0.0869408	0.139*	-0.0585842	0.0341153	-0.0457559	0.165**	0.0628522	0.0877485	0.0730628	0.0230592	0.0844148	-0.0842077	-0.0376536	0.0468772	0.06701	0.0581198	0.0571287	-0.0167928	0.00107348	0.0125856	0.0527566	0.0620112	0.109225	0.015473	0.0555735	0.161**	0.177**	-0.0505716	0.156**	0.0328392	0.0495936	0.0684253	1	0.174**	0.0411036	0.338**	0.240**	0.204**	-0.092934	-0.0954277	-0.461**	0.113472	0.0142753	0.0164645	0.0522563
	Sig. (2-tailed)	0.131125	0.0054426	0.00142161	0.136293	0.0165484	0.315954	0.559468	0.433652	0.00455261	0.281926	0.132676	0.210847	0.693267	0.148093	0.149094	0.519443	0.422457	0.251242	0.319813	0.328148	0.773943	0.985352	0.829568	0.366576	0.288428	0.0609792	0.791282	0.341509	0.00564343	0.00221634	0.386785	0.00744754	0.57426	0.396046	0.241347		0.00272217	0.481883	2.69747e-09	3.10313e-05	0.000410017	0.11119	0.101881	6.51768e-17	0.0515392	0.807109	0.778246	0.371144
Sex	Correlation Coefficient	-0.0114571	-0.0923955	0.0122976	-0.0439469	0.0515349	-0.071075	0.0692715	0.0616152	0.015299	-0.0104276	0.0750441	0.0305413	0.088538	0.184**	-0.0772658	0.184**	-0.0174243	0.149*	-0.106382	0.158**	0.130*	0.106499	0.0701496	-0.0144806	0.0122427	0.0422245	0.0482708	-0.0151396	-0.130*	0.0352586	0.0815011	-0.00495496	0.126*	0.0189684	0.0883725	0.174**	1	-0.0626304	0.0309622	0.317**	0.0784919	-0.145*	-0.108132	-0.0511688	0.0128557	0.145*	-0.000361439	0.0340689
	Sig. (2-tailed)	0.844646	0.113285	0.83341	0.452068	0.377794	0.223563	0.235562	0.291523	0.793577	0.858452	0.1987	0.601351	0.129213	0.00145878	0.185693	0.00148621	0.765685	0.0104725	0.0680624	0.00638592	0.0251495	0.0677588	0.229665	0.80439	0.834144	0.470004	0.408782	0.795681	0.0255555	0.546373	0.162652	0.932465	0.0302696	0.745606	0.129933	0.00272217		0.283631	0.596346	2.72605e-08	0.178789	0.0129749	0.063626	0.381196	0.825969	0.0126547	0.995068	0.560002
Level of education	Correlation Coefficient	-0.208**	-0.218**	-0.160**	-0.171**	-0.156**	-0.0833268	-0.167**	-0.182**	-0.161**	-0.139*	-0.168**	-0.142*	-0.110065	-0.159**	-0.173**	-0.108355	-0.212**	-0.159**	-0.169**	-0.205**	-0.0615777	-0.221**	-0.215**	-0.180**	-0.111417	-0.250**	-0.310**	-0.192**	-0.175**	-0.150*	-0.171**	-0.195**	-0.188**	-0.103313	-0.127*	0.0411036	-0.0626304	1	-0.081821	-0.047793	-0.00754005	-0.146*	0.0482953	0.135*	-0.125*	-0.0907516	-0.197**	0.10164
	Sig. (2-tailed)	0.000319096	0.000162814	0.00582058	0.00330468	0.00731965	0.153409	0.00407629	0.00171972	0.00553378	0.016807	0.00380862	0.0146898	0.0590073	0.00624011	0.00286034	0.0630788	0.000237928	0.00612109	0.00364445	0.000382991	0.291817	0.00013187	0.000202671	0.00190879	0.0559433	1.35977e-05	5.72618e-08	0.000901797	0.00260741	0.0100913	0.00326449	0.000757003	0.00114336	0.0764486	0.0290812	0.481883	0.283631		0.161003	0.413441	0.897392	0.0121873	0.408544	0.0199838	0.032008	0.119874	0.000646994	0.0813646
BMI	Correlation Coefficient	0.150**	0.212**	0.103526	0.187**	0.214**	0.0165078	0.00911033	-0.0310387	0.163**	0.124*	0.141*	0.110131	0.111746	0.140*	0.126*	0.0628404	0.135*	0.112599	0.112175	0.110025	0.107941	0.0798853	0.149*	0.0995925	0.108521	0.103097	0.0664035	0.124*	0.177**	0.177**	0.0369888	0.137*	-0.00204909	0.0689043	0.0555936	0.338**	0.0309622	-0.081821	1	0.242**	0.305**	0.125*	-0.0846438	-0.240**	0.0588528	-0.174**	-0.109859	-0.0647461
	Sig. (2-tailed)	0.0096453	0.000238153	0.0758422	0.00122928	0.000211675	0.777678	0.87618	0.595438	0.00487415	0.033008	0.0151035	0.0588539	0.0552177	0.0163072	0.0304408	0.282017	0.0201602	0.053374	0.0542829	0.0590983	0.0640996	0.171175	0.0103561	0.0877211	0.0626749	0.0770713	0.255568	0.0334232	0.00227522	0.00221693	0.52685	0.0188641	0.972044	0.238061	0.341333	2.69747e-09	0.596346	0.161003		2.61112e-05	8.76703e-08	0.0323046	0.146993	3.07485e-05	0.313737	0.00265628	0.0594845	0.267649
Systolic blood pressure	Correlation Coefficient	0.0104146	0.0146475	0.0184318	0.0372296	0.0856529	-0.0293593	0.00673822	-0.044698	-0.0023822	-0.0231302	0.0810373	0.0799995	0.0849946	0.127*	-0.0566577	0.0983941	0.0113921	0.132*	-0.10834	0.0830846	-0.0687784	-0.036592	-0.0516491	0.0344209	0.0359082	0.0488616	-0.0346497	0.000501128	-0.078889	0.0333502	0.021383	0.0719591	0.0332304	0.0245573	0.0439654	0.240**	0.317**	-0.047793	0.242**	1	0.620**	0.0619717	-0.0044783	-0.208**	0.037443	-0.0296746	0.0948861	0.0921568
	Sig. (2-tailed)	0.858627	0.802182	0.752564	0.52416	0.142216	0.615506	0.908253	0.444369	0.967502	0.69237	0.165065	0.170562	0.145318	0.0288017	0.332158	0.0916235	0.845517	0.0231003	0.0631162	0.154612	0.238921	0.531295	0.376736	0.555953	0.539002	0.403064	0.553329	0.993162	0.176594	0.568315	0.714553	0.217841	0.569706	0.674443	0.451878	3.10313e-05	2.72605e-08	0.413441	2.61112e-05		8.93731e-33	0.288735	0.938949	0.000315894	0.521783	0.611715	0.103849	0.114224
Diastolic blood pressure	Correlation Coefficient	0.0110733	0.0925645	-0.0111537	0.0284704	0.0527196	-0.00266473	0.00577602	-0.0176163	0.0842427	0.0417779	0.126*	0.0726899	0.09874	0.100111	-0.0310206	0.0579295	0.0328108	0.0553087	-0.0207981	0.0846181	0.0122727	-0.0499416	0.000789083	0.0361783	-0.00237087	0.0515349	-0.0228038	0.0540978	0.0403548	0.0972708	0.0685136	0.102268	-0.014315	0.0125558	0.0154505	0.204**	0.0784919	-0.00754005	0.305**	0.620**	1	0.197**	-0.0181966	-0.266**	0.118*	-0.0293874	0.0588301	0.00439538
	Sig. (2-tailed)	0.849788	0.112625	0.84871	0.626246	0.366912	0.96365	0.921308	0.76318	0.148925	0.474718	0.0302544	0.213192	0.0904831	0.0860738	0.595653	0.321402	0.574591	0.343817	0.722034	0.147116	0.833744	0.392736	0.989233	0.535951	0.967656	0.377794	0.696495	0.354501	0.489908	0.0954061	0.240738	0.0794904	0.806582	0.829966	0.791579	0.000410017	0.178789	0.897392	8.76703e-08	8.93731e-33		0.000682213	0.755621	3.51975e-06	0.042594	0.615167	0.313924	0.940077
Heart rate during resting-state scan	Correlation Coefficient	0.189**	0.158**	-0.0274332	0.167**	0.125*	0.156**	0.148*	0.0848614	0.110045	0.149*	0.185**	0.113188	0.110118	0.161**	0.0774392	0.125*	0.167**	0.0724152	0.130*	0.186**	0.0612223	0.105549	0.135*	0.109637	0.122*	0.134*	0.0543637	0.136*	0.142*	0.0835532	0.108663	0.0667885	0.0536782	0.033885	0.0230338	-0.092934	-0.145*	-0.146*	0.125*	0.0619717	0.197**	1	0.0031955	-0.459**	0.137*	0.132*	0.181**	-0.135*
	Sig. (2-tailed)	0.00114152	0.006464	0.638877	0.00408783	0.0316939	0.00738228	0.0108783	0.145952	0.0590537	0.0102951	0.00145847	0.0521299	0.0588831	0.00550886	0.184704	0.0317804	0.0039871	0.214931	0.0261018	0.00133612	0.294617	0.0702601	0.0201519	0.060006	0.0358734	0.0211049	0.352138	0.019256	0.0147724	0.152291	0.0623283	0.252816	0.358251	0.562124	0.693588	0.11119	0.0129749	0.0121873	0.0323046	0.288735	0.000682213		0.956416	9.388e-17	0.0189183	0.0229706	0.00182125	0.0204635
Change in heart rate (stress - neutral)	Correlation Coefficient	-0.118*	-0.100296	-0.129*	-0.188**	-0.175**	-0.0561711	0.0382036	-0.0854419	-0.0404725	-0.0527548	-0.0515465	0.0758162	0.0180257	-0.0533106	0.0345427	-0.024908	-0.109133	-0.0130427	-0.0578524	-0.0773193	-0.120*	0.048873	-0.0270455	-0.0732702	-0.0826371	-0.100664	-0.101195	-0.067046	-0.0348576	-0.110901	0.0117824	-0.0714188	-0.0248727	-0.0707651	-0.0284597	-0.0954277	-0.108132	0.0482953	-0.0846438	-0.0044783	-0.0181966	0.0031955	1	0.173**	-0.397**	-0.0563838	0.00471113	-0.0255308
	Sig. (2-tailed)	0.0421928	0.0854938	0.0265248	0.00115389	0.00257751	0.336334	0.513356	0.143205	0.488642	0.366592	0.377686	0.194106	0.757845	0.361558	0.554555	0.670066	0.0611992	0.823478	0.322048	0.185388	0.0388541	0.402954	0.643627	0.209551	0.156853	0.0843467	0.082712	0.250987	0.550949	0.0570952	0.840295	0.221325	0.670506	0.225593	0.626376	0.101881	0.063626	0.408544	0.146993	0.938949	0.755621	0.956416		0.00284193	1.47247e-12	0.334505	0.935781	0.662317
Heart rate variability during resting-state scan	Correlation Coefficient	-0.223**	-0.170**	-0.0729451	-0.182**	-0.184**	-0.052231	-0.126*	0.0172917	-0.127*	-0.152**	-0.203**	-0.0891932	-0.118*	-0.214**	0.0518213	-0.0354397	-0.140*	-0.0657661	-0.112694	-0.171**	0.0145565	-0.00943766	-0.0890172	-0.143*	-0.158**	-0.184**	0.00305131	-0.197**	-0.162**	-0.113422	-0.124*	-0.184**	-0.106192	-0.0270544	-0.0634996	-0.461**	-0.0511688	0.135*	-0.240**	-0.208**	-0.266**	-0.459**	0.173**	1	-0.252**	-0.0373299	-0.0884318	0.0315485
	Sig. (2-tailed)	0.000108737	0.00336003	0.211585	0.00165711	0.00150563	0.371376	0.0305443	0.767416	0.0295633	0.00898036	0.000457261	0.126391	0.0423525	0.000214618	0.375145	0.544313	0.0160804	0.260168	0.0531712	0.00319723	0.803386	0.871768	0.127145	0.0136679	0.00660447	0.00149998	0.958381	0.000677931	0.00535806	0.0516419	0.0326497	0.00146964	0.0685598	0.643518	0.276989	6.51768e-17	0.381196	0.0199838	3.07485e-05	0.000315894	3.51975e-06	9.388e-17	0.00284193		1.17903e-05	0.523043	0.129674	0.589406
Change in heart rate variability (stress - neutral)	Correlation Coefficient	0.142*	0.143*	0.06509	0.188**	0.159**	0.0896302	0.0996083	0.0913437	0.0949607	0.136*	0.0836827	0.0867618	0.072343	0.04808	0.00751075	0.0313067	0.090064	0.0420206	0.125*	0.144*	0.0258628	0.0425857	0.118*	0.100881	0.0835833	0.134*	0.0492453	0.116*	0.118*	0.105241	0.0823685	0.132*	0.0921256	0.0789925	0.0857453	0.113472	0.0128557	-0.125*	0.0588528	0.037443	0.118*	0.137*	-0.397**	-0.252**	1	0.0436926	0.0293021	0.0325538
	Sig. (2-tailed)	0.0149743	0.0137728	0.26511	0.00114983	0.00617577	0.124537	0.0876707	0.117467	0.103576	0.0190977	0.151655	0.137104	0.21539	0.410638	0.897789	0.592264	0.122716	0.472152	0.0313884	0.0135856	0.658202	0.466211	0.0428519	0.0836762	0.152143	0.0217589	0.399376	0.0460396	0.0424585	0.0710884	0.15821	0.0233325	0.114347	0.176025	0.141784	0.0515392	0.825969	0.032008	0.313737	0.521783	0.042594	0.0189183	1.47247e-12	1.17903e-05		0.454692	0.616195	0.577593
Baseline salivary cortisol	Correlation Coefficient	0.00557342	-0.0592198	0.0469732	-0.0437723	-0.0199894	-0.0607204	0.105392	0.107167	0.0215371	0.0259968	0.105933	0.138*	0.148*	0.147*	-0.00978258	0.0557247	0.103133	0.140*	0.0622147	0.0891722	0.0470905	0.0622889	0.0787762	0.045468	0.137*	0.111914	0.053778	0.061784	0.0488003	-0.0031756	0.0254932	-0.00807105	0.017033	-0.00970706	-0.00213753	0.0142753	0.145*	-0.0907516	-0.174**	-0.0296746	-0.0293874	0.132*	-0.0563838	-0.0373299	0.0436926	1	0.454**	-0.0150756
	Sig. (2-tailed)	0.92406	0.310723	0.421507	0.453868	0.732422	0.298601	0.0706809	0.0660435	0.712587	0.656545	0.06924	0.0180411	0.0111497	0.0115488	0.867125	0.340194	0.0769662	0.0158058	0.286845	0.126481	0.420347	0.28627	0.177215	0.436554	0.0186224	0.0548508	0.357357	0.290201	0.403654	0.956687	0.662785	0.89021	0.770799	0.868141	0.970838	0.807109	0.0126547	0.119874	0.00265628	0.611715	0.615167	0.0229706	0.334505	0.523043	0.454692		2.11396e-16	0.796525
Salivary cortisol after stress induction	Correlation Coefficient	-0.0366986	-0.0190668	0.0143101	-0.00122039	-0.0295833	-0.0633536	-0.0489536	-0.0763551	-0.00627221	-0.0435746	-0.0173807	0.0521154	0.0246926	0.0811763	-0.0338318	-0.0399777	0.0103081	0.0735722	0.0407915	-0.0204059	-0.0363609	-0.0842618	-0.0246868	-0.0321801	-0.0454464	0.0874677	-0.0360639	-0.0133612	-0.0275521	-0.0748009	-0.0906308	-0.0505886	-0.126*	-0.131*	-0.110622	0.0164645	-0.000361439	-0.197**	-0.109859	0.0948861	0.0588301	0.181**	0.00471113	-0.0884318	0.0293021	0.454**	1	0.0161386
	Sig. (2-tailed)	0.530099	0.744332	0.806648	0.983348	0.612813	0.278097	0.402178	0.190947	0.914573	0.455912	0.766255	0.372437	0.672753	0.164339	0.562739	0.493976	0.860058	0.207674	0.485219	0.727066	0.533893	0.148832	0.672825	0.581972	0.436772	0.133925	0.537242	0.81924	0.637424	0.200163	0.12037	0.386626	0.0306132	0.0243063	0.0577273	0.778246	0.995068	0.000646994	0.0594845	0.103849	0.313924	0.00182125	0.935781	0.129674	0.616195	2.11396e-16		0.782524
Hair cortisol	Correlation Coefficient	-0.0542903	-0.0862075	-0.00349622	-0.089866	-0.0675525	-0.0599755	0.00660469	-0.0533182	-0.029873	-0.0224782	-0.111253	-0.0741554	-0.0328777	-0.00941625	-0.106389	0.0185908	-0.0195341	0.034687	-0.0381862	-0.0559381	0.0150579	-0.0797401	-0.0704808	-0.021291	-0.0459319	-0.0589808	0.0302196	-0.0329643	-0.0317519	-0.0025545	-0.0169277	-0.00118157	-0.0438597	0.0359023	0.06924	0.0522563	0.0340689	0.10164	-0.0647461	0.0921568	0.00439538	-0.135*	-0.0255308	0.0315485	0.0325538	-0.0150756	0.0161386	1
	Sig. (2-tailed)	0.352789	0.139642	0.952319	0.123545	0.247416	0.304579	0.910063	0.361489	0.609336	0.700618	0.0563084	0.204084	0.573812	0.872057	0.0680445	0.7505	0.738292	0.552902	0.513548	0.338346	0.796758	0.171957	0.227467	0.715729	0.431884	0.312684	0.605188	0.572802	0.587007	0.965153	0.772176	0.983877	0.452967	0.539069	0.235776	0.371144	0.560002	0.0813646	0.267649	0.114224	0.940077	0.0204635	0.662317	0.589406	0.577593	0.796525	0.782524
Number of chronic somatic disorders	Correlation Coefficient	0.214**	0.275**	0.136*	0.0437029	0.0819007	0.0185313	0.120*	0.0510435	0.180**	0.0458021	0.172**	0.107277	0.0654783	0.105391	-0.0068385	0.114097	0.175**	0.117*	0.0556446	0.172**	0.0273225	0.108437	0.052979	0.151**	0.0812001	0.133*	0.066004	0.163**	0.138*	0.139*	0.082363	0.152**	0.0460761	0.0627461	0.0573644	0.294**	0.0437433	-0.0856175	0.182**	0.119*	0.191**	0.101002	-0.053048	-0.254**	0.117*	-0.0330216	-0.0101222	-0.0119696
	Sig. (2-tailed)	0.000219544	1.55047e-06	0.0198436	0.454586	0.160594	0.751273	0.0389563	0.382365	0.00196542	0.433187	0.00308761	0.0657624	0.262265	0.0706854	0.906894	0.050258	0.00251224	0.0441231	0.34089	0.00303376	0.640232	0.0628778	0.364556	0.00943613	0.164215	0.0227861	0.258445	0.00488466	0.0181224	0.0171614	0.158238	0.00888372	0.430438	0.282741	0.326153	2.75521e-07	0.454168	0.142381	0.00167995	0.0406237	0.000992896	0.0833039	0.363931	1.02159e-05	0.0445624	0.572135	0.862556	0.837792
Subjective stress at baseline	Correlation Coefficient	0.462**	0.392**	0.228**	0.299**	0.394**	0.303**	0.314**	0.321**	0.389**	0.355**	0.270**	0.317**	0.235**	0.106096	0.136*	0.210**	0.378**	0.0105268	0.397**	0.334**	0.216**	0.230**	0.306**	0.417**	0.340**	0.418**	0.237**	0.369**	0.344**	0.186**	0.312**	0.369**	0.273**	0.161**	0.228**	-0.00659238	-0.0523803	-0.029115	0.0428306	-0.0808506	-0.00197298	0.192**	-0.104336	-0.139*	0.0858662	0.0565241	0.0127139	-0.0998433
	Sig. (2-tailed)	5.16441e-17	2.79189e-12	7.59279e-05	1.58203e-07	2.14611e-12	1.11837e-07	3.43389e-08	1.63281e-08	4.56714e-12	3.35592e-10	2.50833e-06	2.62928e-08	4.44826e-05	0.0688102	0.0192793	0.000277105	1.76352e-11	0.85712	1.33428e-12	4.08054e-09	0.000178915	6.77299e-05	8.12646e-08	7.35929e-14	1.93e-09	6.20084e-14	3.926e-05	6.1779e-11	1.25357e-09	0.00136427	4.54021e-08	6.15693e-11	2.02719e-06	0.00568557	7.92488e-05	0.91023	0.370009	0.618449	0.463648	0.166044	0.973082	0.00092737	0.0735661	0.0168956	0.141222	0.333301	0.827858	0.0869216
Change in subjective stress (stress - neutral)	Correlation Coefficient	-0.0992779	-0.0885334	-0.050197	-0.0371622	-0.125*	-0.0871909	-0.0136852	-0.123*	-0.104183	-0.0692631	-0.0817025	-0.0558249	-0.0353823	-0.140*	-0.141*	-0.101091	-0.118*	-0.0740618	-0.0492287	-0.119*	-0.126*	-0.0143832	-0.167**	-0.107206	-0.0624935	-0.0753091	-0.0750935	-0.0407331	-0.0289762	-0.0718435	-0.0360114	-0.0746125	-0.00834028	0.0117388	-0.0430514	0.0209825	-0.136*	0.0046765	-0.0482078	-0.0234459	0.0516916	-0.0357633	0.161**	0.0662223	-0.00717573	-0.0336231	0.0197874	0.00980526
	Sig. (2-tailed)	0.0887325	0.129232	0.390317	0.524912	0.031952	0.135165	0.814936	0.0351369	0.0739923	0.235619	0.161612	0.339326	0.544966	0.0161594	0.0150818	0.0830309	0.0435826	0.204657	0.399535	0.040584	0.0307365	0.80568	0.00398093	0.0659442	0.284687	0.197114	0.198403	0.485845	0.620124	0.218583	0.537835	0.201302	0.886572	0.840878	0.461345	0.719673	0.0194184	0.936252	0.409394	0.68839	0.376343	0.540642	0.00571368	0.256869	0.902324	0.565152	0.735024	0.866819
NEMESIS: emotional neglect	Correlation Coefficient	0.280**	0.307**	0.204**	0.205**	0.179**	0.213**	0.248**	0.219**	0.236**	0.293**	0.253**	0.219**	0.213**	0.200**	0.210**	0.219**	0.333**	-0.0351856	0.269**	0.280**	0.145*	0.168**	0.235**	0.300**	0.237**	0.304**	0.203**	0.353**	0.328**	0.254**	0.271**	0.349**	0.218**	0.221**	0.205**	0.09552	-0.170**	-0.147*	0.0717948	-0.0459811	0.0876901	0.100035	-0.0344534	-0.164**	0.0769339	-0.0618178	-0.0290949	-0.0844529
	Sig. (2-tailed)	1.05551e-06	7.22919e-08	0.000429713	0.000384412	0.00207763	0.000231665	1.66447e-05	0.000149697	4.25223e-05	2.85656e-07	1.0719e-05	0.000145273	0.000221279	0.000566366	0.000275844	0.000149677	4.54534e-09	0.547206	2.78991e-06	1.03865e-06	0.0124878	0.0038468	4.69135e-05	1.44992e-07	3.83587e-05	1.04344e-07	0.000455493	4.45166e-10	8.24183e-09	1.00966e-05	2.24433e-06	6.86357e-10	0.000156254	0.000133707	0.000403307	0.101549	0.0034186	0.0115772	0.218897	0.43139	0.132935	0.0863139	0.55558	0.00483225	0.187595	0.289937	0.618692	0.14791
NEMESIS: psychological abuse	Correlation Coefficient	0.187**	0.226**	0.167**	0.188**	0.152**	0.138*	0.190**	0.192**	0.200**	0.243**	0.157**	0.119*	0.113452	0.0975755	0.110526	0.167**	0.245**	-0.058382	0.202**	0.224**	0.153**	0.141*	0.176**	0.244**	0.183**	0.241**	0.176**	0.241**	0.256**	0.239**	0.179**	0.194**	0.171**	0.164**	0.152**	0.0308961	-0.043594	-0.119*	-0.0121505	-0.0410265	0.0445928	0.0951255	-0.0762044	-0.118*	0.0594264	-0.0715476	-0.0490668	-0.119*
	Sig. (2-tailed)	0.0012165	9.11503e-05	0.00412241	0.00119483	0.00908216	0.0173147	0.00105484	0.000937258	0.000532576	2.44032e-05	0.00685526	0.0414669	0.0515798	0.094368	0.057946	0.00403775	2.15352e-05	0.31763	0.000492088	0.000105882	0.00861441	0.0155697	0.00247122	2.34334e-05	0.00157569	2.86968e-05	0.00243356	2.85907e-05	8.2785e-06	3.4663e-05	0.00204451	0.000833211	0.00325004	0.00470206	0.0087228	0.597131	0.455711	0.0404374	0.835375	0.482706	0.445443	0.102975	0.191826	0.0420288	0.309035	0.220491	0.401089	0.041008
NEMESIS: physical abuse	Correlation Coefficient	0.160**	0.156**	0.143*	0.156**	0.179**	0.137*	0.136*	0.173**	0.128*	0.155**	0.0493239	0.0474095	0.0513388	0.0695994	0.0624168	0.152**	0.186**	0.0673271	0.165**	0.172**	0.130*	0.0987131	0.117*	0.223**	0.250**	0.183**	0.185**	0.189**	0.196**	0.170**	0.207**	0.161**	0.200**	0.138*	0.182**	-0.0515519	-0.0392282	-0.0105803	0.00483885	-0.0343633	-0.0499033	-0.00778272	-0.0368187	-0.0538239	0.0141726	-0.0835182	-0.0702236	0.0110926
	Sig. (2-tailed)	0.00597737	0.00734218	0.0138173	0.00739865	0.00204398	0.0183915	0.0195617	0.00287309	0.0275485	0.00758155	0.398623	0.417203	0.379613	0.233347	0.285279	0.00906334	0.00131903	0.249001	0.00457891	0.00308913	0.0260279	0.0905714	0.0442819	0.00010975	1.4118e-05	0.00157824	0.00143668	0.00113936	0.000718358	0.00346926	0.000339253	0.00560196	0.000558918	0.0174706	0.00167848	0.377636	0.502116	0.856402	0.934044	0.556615	0.393099	0.894109	0.528753	0.356947	0.80847	0.152464	0.229172	0.84953
NEMESIS: sexual abuse	Correlation Coefficient	0.167**	0.165**	0.0637003	0.157**	0.0886765	0.0722669	0.0816162	-0.00381155	0.143*	0.120*	0.0581489	0.0499192	0.0640157	-0.00730672	0.063907	-0.0887877	0.0852759	-0.081999	0.160**	0.0503055	-0.00669219	0.0633414	0.103082	0.137*	0.206**	0.131*	0.039573	0.136*	0.168**	0.138*	0.0896245	0.160**	0.0697972	0.0582063	-0.00399479	0.213**	-0.162**	0.0383281	0.110299	-0.0445581	0.0762138	0.0600983	-0.0579001	-0.166**	0.0832635	-0.0503934	-0.0397468	-0.0674624
	Sig. (2-tailed)	0.00391916	0.00456817	0.27547	0.00687395	0.128612	0.215874	0.162057	0.948024	0.0140013	0.0386236	0.31957	0.392948	0.273096	0.900551	0.273912	0.128132	0.143986	0.160091	0.00592895	0.389292	0.908877	0.27819	0.0771145	0.0189102	0.000361796	0.0247197	0.498363	0.0198487	0.0037374	0.0176722	0.124561	0.00604077	0.232019	0.319092	0.94553	0.000230212	0.00518615	0.511983	0.0584659	0.445798	0.191771	0.303588	0.321648	0.00430731	0.153723	0.388463	0.496476	0.248049
Current mood disorder (yes/no)	Correlation Coefficient	0.659**	0.468**	0.269**	0.213**	0.385**	0.261**	0.350**	0.230**	0.358**	0.451**	0.332**	0.261**	0.213**	0.222**	0.0638118	0.318**	0.376**	0.0738515	0.407**	0.494**	0.122*	0.241**	0.305**	0.438**	0.492**	0.391**	0.170**	0.392**	0.400**	0.154**	0.485**	0.401**	0.287**	0.256**	0.244**	0.0843851	0.00465165	-0.071729	0.109362	0.0402861	0.0535866	0.146*	-0.0396961	-0.238**	0.0410062	-0.0224515	0.027912	0.016782
	Sig. (2-tailed)	4.70808e-38	1.78487e-17	2.72138e-06	0.000233395	7.21076e-12	5.77671e-06	6.19014e-10	6.78662e-05	2.29363e-10	3.40445e-16	4.86008e-09	5.62484e-06	0.000224197	0.000120571	0.274629	2.36798e-08	2.29649e-11	0.205949	3.42183e-13	1.56347e-19	0.036501	2.84363e-05	8.96073e-08	3.10192e-15	2.36682e-19	3.05134e-12	0.00344062	2.76341e-12	9.17257e-13	0.00823769	8.61582e-19	8.23797e-13	5.42601e-07	8.13897e-06	2.20004e-05	0.148237	0.93659	0.21932	0.0606529	0.490647	0.359073	0.0120293	0.497027	3.72511e-05	0.482922	0.700957	0.633034	0.774084
Current anxiety disorder (yes/no)	Correlation Coefficient	0.345**	0.306**	0.0589973	0.310**	0.285**	0.172**	0.201**	0.222**	0.211**	0.330**	0.297**	0.337**	0.207**	0.183**	0.224**	0.221**	0.359**	0.024871	0.380**	0.331**	0.0907081	0.144*	0.300**	0.330**	0.284**	0.272**	0.123*	0.372**	0.278**	0.131*	0.220**	0.255**	0.160**	0.055132	0.130*	-0.0459914	-0.0945364	-0.104151	-0.0268567	-0.0135796	-0.0801805	0.0615868	-0.117*	-0.00213716	0.0422681	-0.00539087	0.0496354	-0.043049
	Sig. (2-tailed)	1.11119e-09	7.85549e-08	0.312548	5.5322e-08	6.19799e-07	0.00306342	0.000500831	0.000117419	0.000266185	6.16453e-09	1.92891e-07	2.7296e-09	0.000356538	0.00158792	0.000102186	0.00012789	2.15142e-10	0.670526	1.46468e-11	5.62137e-09	0.120052	0.0133535	1.47666e-07	6.27534e-09	7.2918e-07	2.04154e-06	0.0353824	4.15419e-11	1.23624e-06	0.0241678	0.000144033	8.97089e-06	0.00590354	0.345363	0.0258644	0.431287	0.105135	0.0740796	0.645945	0.816337	0.169594	0.291747	0.0439926	0.970843	0.469545	0.92654	0.395647	0.461369
Autism spectrum disorder (yes/no)	Correlation Coefficient	0.141*	0.105602	-0.0948699	0.0480242	0.150*	0.115*	0.180**	0.132*	0.191**	0.234**	0.463**	0.415**	0.512**	0.285**	0.337**	0.383**	0.293**	0.115*	0.201**	0.298**	0.218**	0.0778936	0.323**	0.268**	0.143*	0.251**	0.130*	0.337**	0.141*	0.261**	0.233**	0.117*	0.173**	0.0353917	0.0604609	-0.134*	0.153**	-0.0877701	-0.0249117	-0.0147978	0.0365032	0.141*	-0.00695164	-0.0605723	0.0366595	0.0483802	0.0143969	-0.0813207
	Sig. (2-tailed)	0.0152374	0.0701198	0.103908	0.411182	0.0100336	0.0483698	0.00192609	0.022979	0.000950893	4.81759e-05	4.59535e-17	1.04323e-13	3.94206e-21	6.24781e-07	2.73466e-09	9.60092e-12	3.01946e-07	0.0478065	0.000511705	1.82482e-07	0.00016359	0.182133	1.43058e-08	3.156e-06	0.0138645	1.3268e-05	0.0255387	3.01669e-09	0.0154467	5.42989e-06	5.26398e-05	0.0439451	0.00286168	0.544859	0.300675	0.0212041	0.00862704	0.13258	0.670019	0.800194	0.532293	0.0154349	0.90536	0.299783	0.530538	0.407719	0.805498	0.163587
Attention deficit hyperactivity disorder (yes/no)	Correlation Coefficient	0.0783888	0.138*	-0.0344185	0.0454123	0.0875978	0.0788905	0.372**	0.406**	0.239**	0.130*	0.00115953	0.145*	0.124*	-0.0553649	0.186**	0.0685565	0.130*	-0.0136788	0.120*	0.0251192	0.296**	0.426**	0.265**	0.161**	0.124*	0.260**	0.490**	0.165**	0.132*	0.291**	0.291**	0.413**	0.429**	0.374**	0.383**	-0.138*	0.0346321	-0.202**	0.0244174	-0.000775556	0.0145595	0.046783	-0.000856952	0.0634079	-0.0203985	-0.0503779	-0.0388977	-0.0384512
	Sig. (2-tailed)	0.179362	0.0176221	0.555981	0.437117	0.133345	0.176585	4.23336e-11	3.70876e-13	3.35066e-05	0.0256581	0.984178	0.0126411	0.0338451	0.343327	0.00130251	0.240444	0.0258819	0.81502	0.0396777	0.667433	2.24515e-07	2.01894e-14	3.99584e-06	0.0054921	0.0327371	5.89128e-06	3.43652e-19	0.00439031	0.0228473	3.80112e-07	3.80577e-07	1.39277e-13	1.21504e-14	2.9887e-11	9.71084e-12	0.0179111	0.55353	0.00046938	0.676193	0.989417	0.803346	0.423391	0.988306	0.277684	0.727162	0.388609	0.505727	0.510628
Addiction disorder (yes/no)	Correlation Coefficient	0.180**	0.186**	0.127*	0.00405698	0.153**	0.180**	0.265**	0.262**	0.239**	0.274**	0.229**	0.221**	0.197**	0.122*	0.109779	0.113292	0.162**	-0.0454984	0.204**	0.250**	0.158**	0.260**	0.192**	0.218**	0.197**	0.242**	0.212**	0.213**	0.152**	0.154**	0.220**	0.183**	0.222**	0.145*	0.167**	0.0202964	0.126*	-0.126*	-0.0298303	0.0792352	0.0782607	0.0173985	-0.120*	-0.00550483	0.127*	0.111411	-0.0955877	-0.0273911
	Sig. (2-tailed)	0.00186548	0.00131972	0.0286263	0.944683	0.00842949	0.00194808	3.83949e-06	5.2477e-06	3.43803e-05	1.79746e-06	7.12924e-05	0.000133404	0.000667595	0.036526	0.0596733	0.0519131	0.00525388	0.436247	0.000417286	1.34253e-05	0.00649702	6.01604e-06	0.000939351	0.00015948	0.000650681	2.56093e-05	0.000241503	0.00022715	0.00893002	0.0079299	0.000139014	0.00164075	0.000121508	0.0127003	0.00403421	0.728473	0.0303408	0.0303016	0.609848	0.174696	0.180076	0.766021	0.039197	0.924992	0.0292726	0.0559557	0.101306	0.639393
Psychiatrically healthy (yes/no)	Correlation Coefficient	-0.657**	-0.573**	-0.145*	-0.307**	-0.535**	-0.303**	-0.625**	-0.523**	-0.614**	-0.609**	-0.581**	-0.573**	-0.519**	-0.327**	-0.430**	-0.447**	-0.596**	-0.0645952	-0.605**	-0.605**	-0.363**	-0.554**	-0.653**	-0.631**	-0.584**	-0.635**	-0.507**	-0.621**	-0.583**	-0.447**	-0.655**	-0.660**	-0.612**	-0.446**	-0.518**	-0.0165617	-0.106547	0.227**	-0.150**	-0.0349628	-0.098001	-0.213**	0.0436134	0.175**	-0.102778	-0.048376	0.0380369	0.102733
	Sig. (2-tailed)	7.51009e-38	3.73113e-27	0.0124509	7.12756e-08	3.38659e-23	1.10949e-07	2.01204e-33	4.22938e-22	5.68516e-32	2.32387e-31	5.21547e-28	3.72583e-27	9.2813e-22	8.39817e-09	1.0196e-14	6.93595e-16	1.06229e-29	0.268768	7.39011e-31	7.61772e-31	1.34903e-10	4.05799e-25	3.27773e-37	3.30244e-34	2.37195e-28	9.15098e-35	1.20986e-20	7.78739e-33	2.72206e-28	6.42287e-16	1.63212e-37	2.43149e-38	1.03158e-31	8.43062e-16	1.0983e-21	0.776972	0.0676323	8.293e-05	0.0098147	0.549747	0.0929334	0.000225801	0.455511	0.00251831	0.0779945	0.407759	0.515196	0.0781242
Level of smoking	Correlation Coefficient	0.207**	0.255**	0.135*	0.0637408	0.212**	0.110324	0.217**	0.277**	0.259**	0.238**	0.175**	0.183**	0.163**	0.187**	0.10721	0.121*	0.223**	0.0456073	0.235**	0.218**	0.236**	0.317**	0.221**	0.206**	0.197**	0.193**	0.221**	0.190**	0.182**	0.167**	0.200**	0.204**	0.176**	0.0963012	0.135*	0.0505071	0.116*	-0.115*	0.0657106	0.0624133	0.0336005	-0.0416151	-0.126*	-0.00125193	0.128*	0.0881822	-0.128*	-0.052014
	Sig. (2-tailed)	0.000354681	9.21329e-06	0.0200207	0.275165	0.000247989	0.0584094	0.000167438	1.38883e-06	6.6098e-06	3.74095e-05	0.00253861	0.00163936	0.00509153	0.00128735	0.0659333	0.0375284	0.000109438	0.435149	4.54408e-05	0.000162681	4.08388e-05	2.72378e-08	0.000126623	0.0003585	0.000684679	0.000857828	0.000128087	0.0010108	0.00170502	0.00409721	0.00055928	0.000415348	0.00237078	0.0987705	0.0203648	0.387392	0.0465466	0.0493125	0.260572	0.285307	0.565413	0.476442	0.0310918	0.982918	0.0279218	0.130764	0.0277432	0.373369
Cannabis use (yes/no)	Correlation Coefficient	0.101389	0.106898	0.0933639	-0.0474235	0.0449963	0.176**	0.124*	0.214**	0.155**	0.101795	0.135*	0.141*	0.107955	0.07167	0.120*	0.159**	0.184**	-0.0328443	0.0779927	0.180**	0.101686	0.183**	0.116*	0.0874706	0.067885	0.0813024	0.181**	0.198**	0.0952418	0.101141	0.158**	0.198**	0.147*	0.0681993	0.0875865	-0.0737525	0.00691444	0.0141963	-0.177**	-0.0118766	-0.00350259	0.0267757	-0.0914544	0.0430701	0.0290575	0.0838572	-0.0597364	0.0480567
	Sig. (2-tailed)	0.0821217	0.066728	0.10954	0.417065	0.441332	0.0024563	0.0337801	0.00021686	0.00767826	0.0808965	0.0205234	0.0151152	0.0640653	0.2197	0.0391552	0.00618715	0.00148057	0.574201	0.181576	0.00191848	0.0812254	0.00159269	0.0464778	0.133912	0.245092	0.163683	0.00185171	0.000620746	0.102553	0.0828779	0.00645945	0.000635727	0.0117012	0.242908	0.133395	0.206559	0.905864	0.808155	0.00229631	0.839035	0.952232	0.64694	0.117021	0.46115	0.619144	0.1508	0.306514	0.410865
Alcohol consumption	Correlation Coefficient	-0.105711	-0.1044	-0.133*	-0.0736645	-0.048775	-0.00500598	-0.000574794	-0.00611957	-0.084138	-0.0575785	-0.165**	-0.102965	-0.0752417	-0.0647154	-0.0467577	-0.174**	-0.0831268	-0.117*	-0.0598531	-0.0824742	0.0207321	0.0572981	-0.100589	-0.147*	-0.0946561	-0.102811	-0.0306239	-0.122*	-0.129*	-0.000164919	0.0270397	-0.047858	0.020943	0.0383286	0.0095345	0.0492841	0.172**	0.184**	-0.0687109	0.0580348	-0.018693	-0.168**	0.0428646	0.0593562	-0.0663937	-0.0247388	-0.0319124	0.0201201
	Sig. (2-tailed)	0.0698282	0.0733873	0.0226343	0.207103	0.403899	0.931772	0.992157	0.916644	0.149432	0.324348	0.00457547	0.0774526	0.197517	0.267877	0.423643	0.00268527	0.154402	0.0452246	0.305569	0.157675	0.72288	0.326714	0.0845777	0.0112582	0.104693	0.0778968	0.600367	0.0362792	0.0268775	0.99775	0.643698	0.412804	0.720179	0.511977	0.870464	0.399004	0.00307381	0.00154435	0.239384	0.320521	0.749174	0.00384263	0.463293	0.309608	0.255637	0.672176	0.585117	0.730739
Antipsychotic (yes/no)	Correlation Coefficient	0.234**	0.149*	0.0774821	0.0763626	0.224**	0.0856591	0.0633766	0.00552666	0.109281	0.184**	0.173**	0.136*	0.130*	0.142*	0.029412	0.125*	0.124*	0.046981	0.195**	0.199**	-0.0425533	0.0862784	0.200**	0.187**	0.159**	0.187**	0.00572793	0.112845	0.117*	0.0118419	0.120*	0.121*	0.0569115	-0.0367732	0.0531194	0.0664797	0.00348061	-0.0893776	0.127*	-0.0250662	0.0663626	0.0854336	-0.0657483	-0.141*	0.0832843	0.057042	0.0362628	0.0829928
	Sig. (2-tailed)	5.10429e-05	0.010638	0.184461	0.190903	0.000101731	0.142187	0.277923	0.924695	0.0608467	0.00153292	0.00294112	0.0197434	0.0251225	0.0145322	0.614872	0.0318285	0.0339787	0.42143	0.00075108	0.000601117	0.46655	0.139315	0.000560013	0.00125404	0.00630778	0.00124741	0.921961	0.0528505	0.0442839	0.839498	0.0401601	0.0379404	0.329994	0.529263	0.363284	0.255021	0.952532	0.125606	0.0295635	0.668093	0.255861	0.143244	0.260297	0.0153744	0.15362	0.328884	0.534998	0.15507
Anxiolytic, hypnotic, and/or sedative (yes/no)	Correlation Coefficient	0.241**	0.188**	0.159**	0.0940179	0.203**	0.116*	0.0947216	0.0544418	0.149*	0.202**	0.128*	0.150**	0.0799611	0.068238	0.0990298	0.0950978	0.182**	0.0039506	0.200**	0.189**	0.0132007	0.0404063	0.154**	0.222**	0.184**	0.251**	0.167**	0.201**	0.227**	0.102416	0.141*	0.186**	0.100887	0.0574514	0.0552456	0.0494203	-0.0779132	-0.135*	0.199**	-0.0487355	0.050608	0.0887716	-0.102592	-0.0925027	0.089902	0.0594298	-0.0225712	0.0721523
	Sig. (2-tailed)	2.7618e-05	0.00114269	0.00612089	0.107065	0.000446175	0.0471481	0.104452	0.351445	0.0103374	0.000495229	0.0279189	0.00977216	0.170768	0.24264	0.0895367	0.103076	0.0017198	0.946131	0.000550537	0.00107597	0.821375	0.489354	0.0079165	0.00012312	0.00148323	1.24652e-05	0.0040759	0.000508981	8.37733e-05	0.0790525	0.0152806	0.00132212	0.0836562	0.325419	0.344369	0.397701	0.182023	0.0203772	0.000578733	0.40428	0.386443	0.128201	0.078537	0.112866	0.123394	0.309008	0.699441	0.216605
Antidepressant (yes/no)	Correlation Coefficient	0.457**	0.369**	0.0882524	0.217**	0.345**	0.169**	0.271**	0.163**	0.259**	0.352**	0.283**	0.250**	0.164**	0.110108	0.0110102	0.168**	0.293**	-0.0257739	0.274**	0.277**	0.00399297	0.149*	0.258**	0.360**	0.337**	0.343**	0.0666513	0.309**	0.225**	0.0885562	0.312**	0.289**	0.198**	0.138*	0.150*	0.185**	-0.130*	-0.120*	0.221**	0.0742561	0.172**	0.218**	-0.0457007	-0.397**	0.110298	-0.0351502	-0.00291084	0.00612059
	Sig. (2-tailed)	1.19221e-16	5.81159e-11	0.130457	0.000178297	1.15596e-09	0.00363675	2.36899e-06	0.0050851	6.5697e-06	4.8852e-10	8.00857e-07	1.39035e-05	0.00471685	0.0589083	0.850635	0.00379529	3.01849e-07	0.659304	1.814e-06	1.35287e-06	0.945554	0.0104837	7.20564e-06	1.85319e-10	2.93664e-09	1.44566e-09	0.253794	5.9593e-08	9.66516e-05	0.129133	4.58189e-08	4.33421e-07	0.000615592	0.0175042	0.0100808	0.00142944	0.0259974	0.0390354	0.000130105	0.203468	0.00300078	0.000161037	0.434208	1.4342e-12	0.0584697	0.547609	0.960295	0.91663
Central-acting sympathomimetic (yes/no)	Correlation Coefficient	0.0410663	0.122*	-0.135*	0.0109095	0.029791	0.064545	0.130*	0.150**	0.0680785	0.060994	0.067122	0.102221	0.122*	0.0747377	0.0699222	0.0443184	0.00899711	0.064666	0.0353658	0.0696776	0.111813	0.144*	0.0632011	0.0155833	0.0397708	0.0361623	0.192**	0.0734568	0.0338445	0.0973734	0.156**	0.147*	0.177**	0.132*	0.167**	-0.0312707	-0.023624	-0.0944437	-0.000464416	0.0176725	0.0799373	0.139*	0.0754081	-0.063169	0.0315924	-0.0674192	-0.0945118	-0.0850705
	Sig. (2-tailed)	0.482281	0.0365645	0.0202036	0.851984	0.610319	0.269141	0.0250132	0.00979095	0.243746	0.296424	0.250449	0.0796292	0.0359672	0.200544	0.231182	0.448251	0.877706	0.268242	0.545154	0.232822	0.0550716	0.0130177	0.279258	0.78983	0.496216	0.536131	0.000945989	0.20839	0.562591	0.0950558	0.00729385	0.011665	0.00224806	0.0231598	0.00406298	0.59269	0.686147	0.105478	0.993663	0.762446	0.170896	0.0168773	0.196524	0.279502	0.588888	0.248353	0.105226	0.144958
WHODAS: cognition	Correlation Coefficient	0.722**	0.586**	0.331**	0.411**	0.572**	0.345**	0.699**	0.564**	0.621**	0.643**	0.501**	0.584**	0.480**	0.329**	0.245**	0.429**	0.650**	0.150*	0.606**	0.565**	0.300**	0.581**	0.593**	0.610**	0.586**	0.644**	0.560**	0.637**	0.602**	0.507**	0.604**	0.746**	0.617**	0.479**	0.581**	0.105324	0.0139065	-0.233**	0.147*	0.0529608	0.0779422	0.144*	-0.0493228	-0.210**	0.137*	0.0517713	-0.0511849	-0.070575
	Sig. (2-tailed)	1.08514e-48	1.47979e-28	5.86821e-09	2.00866e-13	4.38612e-27	1.1686e-09	1.42231e-44	3.49053e-26	7.08985e-33	7.26032e-36	3.80285e-20	2.58621e-28	2.21059e-18	6.8183e-09	2.01457e-05	1.15551e-14	8.52279e-37	0.0100508	6.24992e-31	2.73187e-26	1.47108e-07	5.36044e-28	2.27035e-29	1.79954e-31	1.27331e-28	5.83838e-36	9.43718e-26	6.12848e-35	1.63572e-30	1.16327e-20	8.99359e-31	1.33345e-53	2.48721e-32	2.29106e-18	4.73519e-28	0.0708636	0.811998	5.49179e-05	0.0115242	0.364721	0.18186	0.0132422	0.398634	0.000280709	0.0184326	0.375607	0.381045	0.226845
WHODAS: mobility	Correlation Coefficient	0.606**	0.554**	0.289**	0.380**	0.492**	0.315**	0.388**	0.295**	0.380**	0.453**	0.371**	0.354**	0.193**	0.240**	0.143*	0.217**	0.467**	0.0993002	0.424**	0.501**	0.142*	0.275**	0.369**	0.406**	0.385**	0.412**	0.245**	0.431**	0.407**	0.182**	0.390**	0.394**	0.334**	0.137*	0.270**	0.111267	0.0102615	-0.281**	0.163**	0.0522519	0.040673	0.191**	-0.0995883	-0.203**	0.0692613	-0.0238259	-0.0799585	-0.0650997
	Sig. (2-tailed)	5.2231e-31	4.39271e-25	4.381e-07	1.51067e-11	2.00779e-19	3.30117e-08	5.19961e-12	2.55206e-07	1.34595e-11	2.43138e-16	4.74031e-11	3.70211e-10	0.000871404	3.07867e-05	0.0140581	0.000172656	2.13296e-17	0.0886604	2.65871e-14	3.77923e-20	0.0148733	1.61295e-06	5.88051e-11	4.0483e-13	6.96249e-12	1.54102e-13	2.07437e-05	8.78512e-15	3.40162e-13	0.0016694	3.67979e-12	2.21581e-12	3.84197e-09	0.0182308	2.63897e-06	0.0562766	0.860684	9.71413e-07	0.00490577	0.371184	0.486489	0.00100341	0.0877345	0.000464056	0.235632	0.683608	0.170782	0.265039
WHODAS: self-care	Correlation Coefficient	0.554**	0.520**	0.245**	0.335**	0.447**	0.248**	0.442**	0.388**	0.369**	0.476**	0.313**	0.294**	0.265**	0.237**	0.152**	0.233**	0.438**	0.0518756	0.522**	0.497**	0.223**	0.319**	0.449**	0.434**	0.424**	0.405**	0.283**	0.431**	0.334**	0.268**	0.446**	0.414**	0.364**	0.244**	0.290**	0.0455455	-0.102476	-0.216**	0.0101787	-0.00421472	0.0309504	0.151**	-0.11024	-0.181**	0.148*	0.0135414	0.0345447	0.0386015
	Sig. (2-tailed)	3.75013e-25	8.28483e-22	2.02948e-05	3.48641e-09	6.89086e-16	1.66819e-05	1.45673e-15	4.83107e-12	5.79716e-11	4.55855e-18	4.10315e-08	2.6888e-07	3.77788e-06	3.95892e-05	0.00902782	5.51382e-05	3.08278e-15	0.374644	5.15823e-22	8.31148e-20	0.000111381	2.19518e-08	5.21106e-16	5.49418e-15	2.84285e-14	4.48204e-13	8.07828e-07	8.28742e-15	4.04941e-09	2.98566e-06	7.88351e-16	1.20874e-13	1.09375e-10	2.31268e-05	3.86317e-07	0.435772	0.0788757	0.000184692	0.861797	0.942536	0.596486	0.00916904	0.0586019	0.00177918	0.0106839	0.816845	0.554532	0.508976
WHODAS: getting along	Correlation Coefficient	0.715**	0.585**	0.274**	0.380**	0.554**	0.423**	0.591**	0.483**	0.539**	0.672**	0.719**	0.601**	0.532**	0.360**	0.293**	0.509**	0.617**	0.161**	0.602**	0.732**	0.288**	0.458**	0.585**	0.612**	0.556**	0.584**	0.387**	0.626**	0.529**	0.396**	0.551**	0.558**	0.492**	0.329**	0.443**	0.141*	0.0555199	-0.188**	0.179**	0.0666983	0.0888577	0.168**	-0.0684078	-0.240**	0.151**	0.0285821	-0.0858694	-0.0552878
	Sig. (2-tailed)	1.57266e-47	1.96088e-28	1.78596e-06	1.39211e-11	4.15618e-25	2.91701e-14	3.39703e-29	1.10958e-18	1.19268e-23	3.75446e-40	2.62476e-48	2.21493e-30	6.37022e-23	1.85781e-10	2.94873e-07	8.34709e-21	2.71729e-32	0.00566192	1.78542e-30	1.04556e-50	4.6554e-07	1.11211e-16	1.96753e-28	1.06626e-31	2.51589e-25	2.53861e-28	5.75475e-12	1.6076e-33	1.25199e-22	1.68708e-12	7.58438e-25	1.35703e-25	2.33017e-19	6.77003e-09	1.35632e-15	0.015602	0.341975	0.00119956	0.0020079	0.253459	0.12783	0.00380175	0.241467	3.06266e-05	0.00931869	0.624892	0.141207	0.344
WHODAS: life activities	Correlation Coefficient	0.613**	0.526**	0.237**	0.350**	0.541**	0.358**	0.662**	0.470**	0.519**	0.565**	0.389**	0.444**	0.325**	0.184**	0.266**	0.278**	0.479**	-0.0110772	0.515**	0.516**	0.318**	0.446**	0.534**	0.523**	0.474**	0.515**	0.434**	0.497**	0.470**	0.342**	0.562**	0.620**	0.572**	0.516**	0.548**	0.127*	-0.0504816	-0.154**	0.122*	-0.00900394	0.0766931	0.138*	-0.0532108	-0.194**	0.117*	0.0338231	-0.0794703	-0.0172486
	Sig. (2-tailed)	8.10429e-32	1.95616e-22	3.8764e-05	6.12095e-10	7.81219e-24	2.30326e-10	1.50018e-38	1.36873e-17	9.77481e-22	2.6367e-26	4.2028e-12	1.0242e-15	1.09587e-08	0.00147697	3.57041e-06	1.22144e-06	2.39937e-18	0.849736	2.08801e-21	1.98127e-21	2.46678e-08	7.69816e-16	3.57977e-23	3.92304e-22	6.84442e-18	1.99498e-21	5.65588e-15	7.75816e-20	1.21503e-17	1.53038e-09	6.34998e-26	1.13644e-32	5.02151e-27	1.8894e-21	1.53442e-24	0.0285841	0.387632	0.00795956	0.0359027	0.877614	0.188984	0.0179286	0.362458	0.000796763	0.045308	0.562839	0.173417	0.76798
WHODAS: participation	Correlation Coefficient	0.787**	0.722**	0.328**	0.426**	0.697**	0.415**	0.582**	0.530**	0.673**	0.720**	0.552**	0.565**	0.435**	0.304**	0.330**	0.444**	0.659**	0.130*	0.706**	0.654**	0.321**	0.495**	0.619**	0.681**	0.620**	0.676**	0.455**	0.631**	0.644**	0.403**	0.571**	0.601**	0.484**	0.303**	0.413**	0.164**	0.0447766	-0.197**	0.175**	0.0469307	0.0616158	0.136*	-0.0891443	-0.221**	0.113778	-0.00231844	-0.0459917	-0.00403313
	Sig. (2-tailed)	2.43058e-63	8.64928e-49	7.79794e-09	2.07463e-14	2.63784e-44	1.0073e-13	3.46985e-28	1.00157e-22	2.51215e-40	2.13432e-48	5.6334e-25	3.01267e-26	4.50495e-15	9.9186e-08	6.42254e-09	1.11522e-15	4.05693e-38	0.0255333	7.67443e-46	1.94145e-37	1.69258e-08	1.16277e-19	1.1983e-32	1.63084e-41	1.01876e-32	1.0524e-40	1.84851e-16	3.86193e-34	6.24856e-36	6.14878e-13	7.00087e-27	2.43387e-30	1.00713e-18	1.16139e-07	1.31328e-13	0.00467272	0.443567	0.000686063	0.00252077	0.421927	0.291519	0.0193352	0.1266	0.000126961	0.050909	0.968371	0.431284	0.945008
SF-20: physical functioning	Correlation Coefficient	-0.431**	-0.382**	-0.243**	-0.290**	-0.330**	-0.198**	-0.242**	-0.177**	-0.331**	-0.270**	-0.235**	-0.229**	-0.119*	-0.153**	-0.0670032	-0.111797	-0.314**	-0.116*	-0.278**	-0.316**	-0.126*	-0.220**	-0.243**	-0.244**	-0.209**	-0.264**	-0.123*	-0.269**	-0.298**	-0.193**	-0.172**	-0.294**	-0.162**	-0.0699276	-0.161**	-0.295**	0.0527015	0.127*	-0.189**	-0.123*	-0.123*	-0.130*	0.0850332	0.247**	-0.0400027	0.0353308	0.0132648	0.0530283
	Sig. (2-tailed)	8.45712e-15	1.15423e-11	2.43594e-05	3.89118e-07	6.18683e-09	0.000644979	2.65111e-05	0.00233181	5.53751e-09	2.59776e-06	4.72762e-05	7.03994e-05	0.0412754	0.00831628	0.25129	0.0551052	3.68529e-08	0.0463982	1.24066e-06	2.97174e-08	0.0305807	0.000139974	2.44151e-05	2.19599e-05	0.000294169	4.28627e-06	0.0351781	2.78846e-06	1.85125e-07	0.000877758	0.0030211	2.73341e-07	0.00525329	0.231145	0.00570176	2.57112e-07	0.367077	0.0291242	0.00113786	0.0343125	0.0347013	0.02607	0.145135	1.76586e-05	0.493707	0.545551	0.820523	0.364109
SF-20: role fulfilment	Correlation Coefficient	-0.421**	-0.419**	-0.176**	-0.181**	-0.310**	-0.126*	-0.262**	-0.156**	-0.261**	-0.302**	-0.291**	-0.257**	-0.137*	-0.193**	-0.100332	-0.135*	-0.326**	-0.0878064	-0.296**	-0.319**	0.00645825	-0.211**	-0.224**	-0.312**	-0.264**	-0.354**	-0.166**	-0.291**	-0.303**	-0.187**	-0.224**	-0.306**	-0.208**	-0.055367	-0.194**	-0.255**	0.0674755	0.224**	-0.165**	-0.0626252	-0.093544	-0.108061	-0.0240353	0.259**	-0.0351909	0.0186787	-0.0341213	0.0457105
	Sig. (2-tailed)	4.11764e-14	5.48445e-14	0.0023723	0.00178959	5.72462e-08	0.030418	5.09944e-06	0.00726185	5.6036e-06	1.287e-07	3.76615e-07	7.49222e-06	0.0189913	0.000879136	0.0853806	0.0202683	9.93395e-09	0.132419	2.26494e-07	2.14508e-08	0.912049	0.000270381	0.000106236	4.26038e-08	4.25622e-06	3.92359e-10	0.00423776	3.53282e-07	1.08666e-07	0.00123879	0.000103251	8.41585e-08	0.000328298	0.343308	0.000819528	8.90005e-06	0.247957	0.000103445	0.00449442	0.283671	0.108854	0.0638026	0.68098	6.84027e-06	0.547144	0.749361	0.559399	0.434109
SF-20: social functioning	Correlation Coefficient	-0.488**	-0.502**	-0.134*	-0.282**	-0.397**	-0.112178	-0.312**	-0.267**	-0.370**	-0.326**	-0.347**	-0.315**	-0.186**	-0.217**	-0.116*	-0.244**	-0.429**	-0.104097	-0.403**	-0.378**	-0.156**	-0.261**	-0.368**	-0.407**	-0.341**	-0.383**	-0.266**	-0.374**	-0.355**	-0.267**	-0.316**	-0.387**	-0.290**	-0.172**	-0.269**	-0.227**	0.0414726	0.194**	-0.199**	-0.0845352	-0.115*	-0.175**	0.0888284	0.301**	-0.101522	-0.000602559	0.0276672	0.0130322
	Sig. (2-tailed)	4.35695e-19	3.04084e-20	0.0216246	8.67922e-07	1.49541e-12	0.0542764	4.29201e-08	3.17155e-06	5.10158e-11	1.01147e-08	9.4318e-10	3.37097e-08	0.00133862	0.000167248	0.0469702	2.2708e-05	1.28691e-14	0.0742322	6.33698e-13	1.9423e-11	0.00742194	5.65157e-06	7.08146e-11	3.40343e-13	1.75038e-09	9.83329e-12	3.49545e-06	3.18059e-11	3.30622e-10	3.19686e-06	2.81229e-08	5.35965e-12	4.08582e-07	0.00298355	2.82249e-06	8.58622e-05	0.477954	0.000812521	0.00058049	0.147514	0.0485294	0.00249816	0.127956	1.42575e-07	0.0817198	0.991778	0.636018	0.823617
SF-20: mental health	Correlation Coefficient	-0.839**	-0.649**	-0.304**	-0.354**	-0.659**	-0.425**	-0.588**	-0.553**	-0.620**	-0.773**	-0.543**	-0.538**	-0.424**	-0.300**	-0.262**	-0.458**	-0.637**	-0.118*	-0.694**	-0.702**	-0.262**	-0.490**	-0.586**	-0.651**	-0.605**	-0.628**	-0.416**	-0.607**	-0.572**	-0.361**	-0.598**	-0.603**	-0.484**	-0.311**	-0.399**	-0.088175	-0.022629	0.177**	-0.145*	-0.0163587	-0.0538025	-0.191**	0.0977757	0.225**	-0.142*	-0.0402344	0.0217105	0.0224687
	Sig. (2-tailed)	2.37585e-79	1.25727e-36	9.67582e-08	4.07641e-10	4.66355e-38	2.3125e-14	7.43173e-29	4.58209e-25	9.74897e-33	8.4214e-60	5.31511e-24	1.7408e-23	2.58394e-14	1.45793e-07	5.0133e-06	1.04333e-16	6.47887e-35	0.0424593	8.98708e-44	4.04004e-45	4.97394e-06	3.13833e-19	1.40933e-28	5.44089e-37	8.11655e-31	9.20882e-34	8.70859e-14	4.11664e-31	4.78008e-27	1.6626e-10	5.05613e-30	1.17716e-30	1.04835e-18	5.13134e-08	9.97844e-13	0.130796	0.698707	0.00231824	0.0125582	0.779634	0.357138	0.000948226	0.0936909	0.000100486	0.014641	0.491205	0.710377	0.70074
SF-20: experienced health	Correlation Coefficient	-0.659**	-0.626**	-0.264**	-0.369**	-0.550**	-0.287**	-0.422**	-0.343**	-0.471**	-0.482**	-0.460**	-0.462**	-0.340**	-0.289**	-0.208**	-0.353**	-0.565**	-0.118*	-0.511**	-0.525**	-0.289**	-0.355**	-0.451**	-0.486**	-0.478**	-0.495**	-0.368**	-0.488**	-0.473**	-0.313**	-0.476**	-0.487**	-0.393**	-0.228**	-0.324**	-0.162**	-0.0756302	0.220**	-0.175**	-0.0348554	-0.124*	-0.247**	0.103497	0.286**	-0.0910086	-0.00486197	-0.0014975	0.0691003
	Sig. (2-tailed)	4.60443e-38	1.86924e-33	4.16508e-06	5.76215e-11	9.45961e-25	5.17572e-07	3.64523e-14	1.46689e-09	1.14485e-17	1.52216e-18	6.85907e-17	5.22403e-17	1.94393e-09	4.44845e-07	0.000315198	4.60023e-10	2.69675e-26	0.042336	4.7088e-21	2.55083e-22	4.30932e-07	3.66548e-10	3.23059e-16	6.35302e-19	3.05005e-18	1.15311e-19	6.69383e-11	4.63024e-19	7.68752e-18	4.03937e-08	3.9834e-18	5.19045e-19	2.30481e-12	7.75261e-05	1.19407e-08	0.00527172	0.195206	0.00014321	0.00256795	0.550975	0.0332339	1.83544e-05	0.0759242	5.97374e-07	0.118824	0.93373	0.979567	0.236725
SF-20: physical pain	Correlation Coefficient	0.449**	0.507**	0.228**	0.306**	0.355**	0.173**	0.275**	0.264**	0.372**	0.324**	0.309**	0.347**	0.233**	0.238**	0.127*	0.185**	0.401**	0.0870283	0.371**	0.365**	0.159**	0.199**	0.314**	0.319**	0.243**	0.329**	0.238**	0.376**	0.378**	0.211**	0.297**	0.394**	0.241**	0.127*	0.232**	0.173**	-0.0203792	-0.213**	0.198**	0.103466	0.133*	0.125*	0.0369575	-0.201**	0.00993931	-0.00595745	0.0129589	-0.0708661
	Sig. (2-tailed)	4.61174e-16	1.15063e-20	7.5371e-05	8.19528e-08	3.36751e-10	0.00281604	1.56751e-06	4.42296e-06	4.21845e-11	1.16971e-08	6.15134e-08	8.7944e-10	5.29034e-05	3.75677e-05	0.0295423	0.00141698	7.78715e-13	0.135897	4.90113e-11	9.48375e-11	0.0063157	0.000599018	3.57926e-08	2.03905e-08	2.5089e-05	6.95613e-09	3.74027e-05	2.31237e-11	1.97835e-11	0.00026678	1.98911e-07	2.22609e-12	2.80589e-05	0.0296064	5.9473e-05	0.00283157	0.727409	0.00022604	0.000637397	0.0760138	0.0223184	0.0314619	0.527199	0.000512334	0.865016	0.918845	0.824594	0.22493
*p < 0.05, ** p < 0.01, NB: these p-values are uncorrected p-values.
See Supplemental Table A and B for an elaborate description of the measures that are included in this Table.
[truncated: 32 more columns]
