# Supplementary material for: Brain structure and function link to variation in biobehavioral dimensions across the psychopathological continuum
Source: eLife. 2023 Jun 19;12:e85006. doi: 10.7554/eLife.85006 (PMC10519708; doi:10.7554/eLife.85006)
Supplement: Supplementary file 2. [file elife-85006-supp2.xlsx]

## Sheet: File 2a
File 2a. Significant spearman correlations from the main analysis (FDR corrected) and the partial spearman correlations (correcting for age and sex) for these results (supplemental analysis).
Component (IC)	Modalities contributing >10% to the IC	Behavioral/demographic measure	Spearman correlation coefficient	P-value (FDR corrected)	Spearman partial correlation coefficient	P-value (FDR corrected)
1	VBM, FA	Heart rate variability during resting-state scan	0.263639	0.000526377	0.0285053	0.647233
1	VBM, FA	NEMESIS: sexual abuse	-0.242776	0.00249401	-0.0687285	0.296463
1	VBM, FA	Antidepressant use (yes/no)	-0.215131	0.0125004	-0.071563	0.278558
1	VBM, FA	SF: physical functioning	0.26467	0.00050574	0.0999756	0.124566
1	VBM, FA	SF: physical pain	-0.190167	0.0473296	-0.109648	0.0905841
1	VBM, FA	CBS: number of chronic diseases under treatment	-0.26656	0.000442742	-0.160534	0.0161959
1	VBM, FA	Age	-0.503724	9.73072e-18	N/A	N/A
1	VBM, FA	Sex	0.331388	1.14426e-06	N/A	N/A
3	ECN (stress-aftermath)	Heart rate (bpm) during resting-state scan	-0.199984	0.0293255	-0.190009	0.00502232
4	FPN (rest)	BMI	-0.19179	0.0442832	-0.0392728	0.546333
4	FPN (rest)	Heart rate variability during resting-state scan	0.356251	7.40525e-08	0.177555	0.00854617
4	FPN (rest)	Age	-0.473653	2.66709e-15	N/A	N/A
5	FA, MD	BMI	0.21152	0.0153756	0.0938191	0.151686
5	FA, MD	Heart rate variability during resting-state scan	-0.221477	0.00918458	-0.0534769	0.420895
5	FA, MD	CBS: number of chronic diseases under treatment	0.269285	0.000359951	0.176748	0.00854617
5	FA, MD	Age	0.386593	1.82681e-09	N/A	N/A
6	ECN (rest)	BMI	-0.237199	0.00367755	-0.173162	0.00940994
6	ECN (rest)	Heart rate variability during resting-state scan	0.275681	0.000234107	0.195249	0.00498395
6	ECN (rest)	Age	-0.23101	0.00550823	N/A	N/A
7	ECN (stress-aftermath)	IDS-SR: anxiety/somatic	-0.226293	0.0070497	-0.164608	0.0144145
7	ECN (stress-aftermath)	Brief-A: self-monitoring	-0.205449	0.0215653	-0.130237	0.0458584
7	ECN (stress-aftermath)	ASI: physical concerns	-0.195369	0.0370561	-0.176678	0.00854617
7	ECN (stress-aftermath)	BMI	-0.360515	4.67228e-08	-0.219355	0.00164018
7	ECN (stress-aftermath)	Heart rate variability during resting-state scan	0.316014	5.79625e-06	0.0781816	0.239906
7	ECN (stress-aftermath)	WHODAS: mobility	-0.21149	0.0153756	-0.181026	0.0079509
7	ECN (stress-aftermath)	WHODAS: life activities	-0.195775	0.0365616	-0.150092	0.0230605
7	ECN (stress-aftermath)	SF: physical functioning	0.228245	0.00635295	0.077886	0.239906
7	ECN (stress-aftermath)	SF: experienced health	0.199984	0.0293255	0.134963	0.0392257
7	ECN (stress-aftermath)	SF: physical pain	-0.21601	0.0119401	-0.144861	0.0288222
7	ECN (stress-aftermath)	Age	-0.559911	9.65193e-23	N/A	N/A
8	ECN (stress)	Brief-A: self-monitoring	-0.223921	0.00806775	-0.152275	0.0214224
8	ECN (stress)	BMI	-0.35419	8.95737e-08	-0.212745	0.00223397
8	ECN (stress)	Heart rate variability during resting-state scan	0.263509	0.000526377	0.00628014	0.929277
8	ECN (stress)	CBS: number of chronic diseases under treatment	-0.206325	0.0206207	-0.0516368	0.432555
8	ECN (stress)	Age	-0.565114	9.65193e-23	N/A	N/A
9	FPN (stress-aftermath)	Heart rate variability during resting-state scan	0.224656	0.00779552	0.0615092	0.355034
9	FPN (stress-aftermath)	Age	-0.379096	4.63017e-09	N/A	N/A
10	FPN (stress)	BMI	-0.248345	0.00163588	-0.111572	0.0881071
10	FPN (stress)	Heart rate variability during resting-state scan	0.217206	0.0116531	0.00334855	0.954487
10	FPN (stress)	Age	-0.472572	2.94761e-15	N/A	N/A
12	DMN (rest), DMN (stress-aftermath)	BMI	-0.228651	0.00629486	-0.0735367	0.268103
12	DMN (rest), DMN (stress-aftermath)	Heart rate variability during resting-state scan	0.275229	0.000234866	0.0570992	0.39118
12	DMN (rest), DMN (stress-aftermath)	Age	-0.507919	5.38157e-18	N/A	N/A
13	ECN (rest)	Brief-A: self-monitoring	-0.194711	0.0381691	-0.116538	0.074006
13	ECN (rest)	Brief-A: working memory	-0.216584	0.0118476	-0.159944	0.0161959
13	ECN (rest)	BMI	-0.293769	4.82821e-05	-0.135172	0.0392257
13	ECN (rest)	Heart rate variability during resting-state scan	0.230215	0.0057209	-0.0379009	0.546333
13	ECN (rest)	SF: physical pain	-0.221365	0.00918458	-0.155099	0.0192555
13	ECN (rest)	Systolic blood pressure	-0.251388	0.00130919	-0.137032	0.037885
13	ECN (rest)	Diastolic blood pressure	-0.198938	0.0309834	-0.101802	0.119157
13	ECN (rest)	Age	-0.562424	9.65193e-23	N/A	N/A
14	FPN (stress-aftermath)	Systolic blood pressure	-0.204069	0.0233219	-0.131815	0.0439549
14	FPN (stress-aftermath)	Diastolic blood pressure	-0.203464	0.0239487	-0.163606	0.0145268
14	FPN (stress-aftermath)	Age	-0.209671	0.0169117	N/A	N/A
15	DMN (stress)	ASI: mental incapacitation concerns	-0.217763	0.0114714	-0.203224	0.00330407
16	DMN (stress)	BMI	-0.284996	0.000107191	-0.125368	0.0537809
16	DMN (stress)	Heart rate variability during resting-state scan	0.351358	1.19094e-07	0.129361	0.0463888
16	DMN (stress)	Systolic blood pressure	-0.235707	0.00403074	-0.109749	0.0905841
16	DMN (stress)	Age	-0.560733	9.65193e-23	N/A	N/A
17	FPN (stress)	Age	-0.271175	0.000314812	N/A	N/A
19	FA, MD	BMI	-0.194517	0.0381719	-0.0376672	0.546333
19	FA, MD	Heart rate variability during resting-state scan	0.261702	0.000597477	0.0428668	0.521885
19	FA, MD	Systolic blood pressure	-0.218568	0.0110257	0.0389111	0.546333
19	FA, MD	Age	-0.534106	2.46974e-20	N/A	N/A
19	FA, MD	Sex	-0.505516	7.64579e-18	N/A	N/A
25	DMN (rest), ECN (rest), FPN (rest), DMN (stress-aftermath), ECN (stress-aftermath), FPN (stress-aftermath)	BMI	0.550728	6.80885e-22	0.497067	6.95518e-18
25	DMN (rest), ECN (rest), FPN (rest), DMN (stress-aftermath), ECN (stress-aftermath), FPN (stress-aftermath)	Heart rate variability during resting-state scan	-0.302221	2.18694e-05	-0.141628	0.0315041
25	DMN (rest), ECN (rest), FPN (rest), DMN (stress-aftermath), ECN (stress-aftermath), FPN (stress-aftermath)	NEMESIS: emotional neglect	0.195929	0.0365616	0.122228	0.0599261
25	DMN (rest), ECN (rest), FPN (rest), DMN (stress-aftermath), ECN (stress-aftermath), FPN (stress-aftermath)	Diastolic blood pressure	0.190659	0.0464313	0.142171	0.0315041
25	DMN (rest), ECN (rest), FPN (rest), DMN (stress-aftermath), ECN (stress-aftermath), FPN (stress-aftermath)	Age	0.400162	3.00937e-10	N/A	N/A
25	DMN (rest), ECN (rest), FPN (rest), DMN (stress-aftermath), ECN (stress-aftermath), FPN (stress-aftermath)	Sex	-0.208985	0.0174663	N/A	N/A
26	VBM, FA, MD	Sex	0.260629	0.000619558	N/A	N/A
27	FPN (rest)	Systolic blood pressure	-0.271254	0.000314812	-0.248099	0.000222634
27	FPN (rest)	Diastolic blood pressure	-0.226291	0.0070497	-0.210259	0.00231832
30	ECN (rest), ECN (stress-aftermath)	Brief-A: inhibition	-0.19158	0.0443424	-0.189784	0.00502232
30	ECN (rest), ECN (stress-aftermath)	Brief-A: self-monitoring	-0.216125	0.0119401	-0.193684	0.00500274
31	DMN (rest), DMN (stress), DMN (stress-aftermath)	BMI	0.237562	0.0036628	0.267367	0.000110522
32	DMN (rest), VBM, DMN (stress), DMN (stress-aftermath)	Autism spectrum disorder (yes/no)	0.192163	0.0437775	0.173837	0.00940994
34	ECN (stress)	TAS-20: externally-oriented thinking	-0.196688	0.0353754	-0.189759	0.00502232
35	VBM, FA, MD	Age	-0.22248	0.00879165	N/A	N/A
35	VBM, FA, MD	Sex	-0.26095	0.000619514	N/A	N/A
37	DMN (stress-aftermath)	Heart rate variability during resting-state scan	0.210418	0.0163062	0.0786293	0.239906
37	DMN (stress-aftermath)	Age	-0.310753	9.58213e-06	N/A	N/A
38	FA, MD	BMI	-0.283635	0.000116925	-0.256912	0.000179977
40	FPN (stress)	BMI	-0.217056	0.0116531	-0.157548	0.0176358
40	FPN (stress)	Age	-0.214313	0.013031	N/A	N/A
45	ECN (rest), ECN (stress), ECN (stress-aftermath)	BMI	0.233561	0.00464281	0.249692	0.000222634

## Sheet: File 2b
File 2b. Structural modalities: VBM, FA, MD
Component (IC)	Modalities contributing >10% to the IC	Behavioral/demographic measure	Spearman correlation coefficient	P-value (FDR corrected)
1	VBM	Heart rate variability during resting-state scan	0.276671	0.000463559
1	VBM	NEMESIS: sexual abuse	-0.231511	0.010446
1	VBM	Antidepressant use (yes/no)	-0.241592	0.00644456
1	VBM	SF: physical functioning	0.278976	0.000409487
1	VBM	SF: physical pain	-0.223099	0.0164981
1	VBM	CBS: number of chronic diseases under treatment	-0.247762	0.00418039
1	VBM	Age	-0.511651	8.80512e-18
1	VBM	Sex	0.31155	2.64607e-05
2	MD, FA	BMI	0.207909	0.0392952
2	MD, FA	Heart rate variability during resting-state scan	-0.240701	0.00652881
2	MD, FA	CBS: number of chronic diseases under treatment	0.28247	0.000325921
2	MD, FA	Age	0.411967	1.30647e-10
4	MD, FA	BMI	-0.294112	0.000119331
4	MD, FA	Heart rate variability during resting-state scan	0.31226	2.64607e-05
4	MD, FA	SF: physical functioning	0.211368	0.0352867
4	MD, FA	CBS: number of chronic diseases under treatment	-0.235545	0.00877477
4	MD, FA	Systolic blood pressure	-0.238676	0.00724782
4	MD, FA	Age	-0.653453	1.05333e-33
4	MD, FA	Sex	-0.421424	3.95077e-11
5	MD, FA	Sex	0.444394	1.3861e-12
6	MD, FA	BMI	0.26571	0.00113717
7	VBM, MD, FA	Sex	0.303117	5.4954e-05
11	VBM, MD, FA	Sex	0.208102	0.0392952
14	MD, FA	Psychiatrically healthy (yes/no)	0.209968	0.0375592
26	VBM, MD, FA	Age	-0.255113	0.00260949
28	VBM, FA	Sex	-0.223442	0.0164981
41	VBM, FA	IDS-SR: anxiety/somatic	0.208253	0.0392952
41	VBM, FA	Stress induced change in heart rate (bpm) (stress - neutral)	-0.228721	0.0117721
41	VBM, FA	Subjective stress at baseline in scanner	0.231423	0.010446
44	VBM, MD	WHODAS: cognition	0.22179	0.0174946
44	VBM, MD	WHODAS: life activities	0.229468	0.0115965
45	VBM, MD, FA	Sex	-0.25067	0.00351825
50	VBM, MD	BMI	-0.233386	0.00985827

## Sheet: File 2c
File 2c. Resting-state scan: spatial maps of DMN, ECN and FPN
Component (IC)	Modalities contributing >10% to the IC	Behavioral/demographic measure	Spearman correlation coefficient	P-value (FDR corrected)
1	FPN	Heart rate variability during resting-state scan	0.21752	0.0302384
1	FPN	Systolic blood pressure	-0.305491	3.45632e-05
1	FPN	Diastolic blood pressure	-0.245302	0.004531
1	FPN	Age	-0.311068	2.49355e-05
2	ECN	Brief-A: working memory	-0.212843	0.0361438
2	ECN	BMI	-0.297681	6.30454e-05
2	ECN	Heart rate variability during resting-state scan	0.23036	0.0130153
2	ECN	SF: physical pain	-0.216123	0.0306354
2	ECN	Systolic blood pressure	-0.247939	0.00412098
2	ECN	Age	-0.56737	3.1332e-23
3	ECN	Heart rate variability during resting-state scan	0.255747	0.00230973
4	FPN	Heart rate variability during resting-state scan	0.299983	5.47244e-05
4	FPN	Age	-0.406752	3.50463e-10
5	DMN	BMI	-0.246241	0.00444868
5	DMN	Heart rate variability during resting-state scan	0.274117	0.000500861
5	DMN	Systolic blood pressure	-0.212599	0.0361438
5	DMN	Diastolic blood pressure	-0.205605	0.0492876
5	DMN	Age	-0.523101	5.36895e-19
5	DMN	Sex	-0.208021	0.0464358
8	DMN, ECN, FPN	CAARS: impulsitivy/emotional lability	-0.205027	0.0492876
8	DMN, ECN, FPN	BMI	-0.58678	4.4176e-25
8	DMN, ECN, FPN	Heart rate variability during resting-state scan	0.308243	2.89766e-05
8	DMN, ECN, FPN	Age	-0.384461	6.33643e-09
11	DMN	Cortisol after stress induction	-0.20787	0.0464358
14	DMN, FPN	Sex	0.286089	0.000178488
21	FPN	Heart rate variability during resting-state scan	0.216106	0.0306354
21	FPN	Age	-0.326615	6.15426e-06
25	ECN	Units of alcohol consumption in last 7 days	-0.24169	0.00572153
25	ECN	Systolic blood pressure	-0.205007	0.0492876
25	ECN	Age	-0.310837	2.49355e-05
27	DMN, ECN, FPN	IDS-SR: sleep	0.206366	0.0492876
27	DMN, ECN, FPN	Sex	-0.221595	0.023658

## Sheet: File 2d
File 2d. Stress scan: spatial maps of DMN, ECN and FPN
Component (IC)	Modalities contributing >10% to the IC	Behavioral/demographic measure	Spearman correlation coefficient	P-value (FDR corrected)
1	ECN	Brief-A: self-monitoring	-0.251587	0.00444935
1	ECN	BMI	-0.419299	5.45579e-11
1	ECN	Heart rate variability during resting-state scan	0.27377	0.000872206
1	ECN	SF: physical functioning	0.208622	0.0475145
1	ECN	CBS: number of chronic diseases under treatment	-0.226235	0.0196645
1	ECN	Systolic blood pressure	-0.236283	0.0103616
1	ECN	Age	-0.607202	1.65768e-27
2	FPN	BMI	-0.24477	0.00654657
2	FPN	Heart rate variability during resting-state scan	0.215642	0.0399847
2	FPN	Age	-0.449827	5.6278e-13
3	DMN	BMI	-0.295963	0.000128013
3	DMN	Heart rate variability during resting-state scan	0.359901	1.51253e-07
3	DMN	Systolic blood pressure	-0.23306	0.0124843
3	DMN	Age	-0.565437	5.04195e-23
4	FPN	Age	-0.241648	0.0077908
8	FPN	BMI	0.211722	0.0434174
8	FPN	Age	0.212764	0.0422291
11	FPN	Age	-0.24575	0.00654657
13	DMN	Age	-0.212922	0.0422291
20	FPN	Age	-0.344677	7.89882e-07
27	DMN, ECN, FPN	BMI	0.269524	0.00105724
34	DMN	Age	-0.214615	0.040827
40	FPN	BMI	-0.272863	0.000872206
40	FPN	CBS: number of chronic diseases under treatment	-0.210301	0.0443913
40	FPN	Age	-0.239889	0.00835057
42	DMN, ECN, FPN	Sex	0.21019	0.0443913

## Sheet: File 2e
File 2e. Stress-aftermath scan: spatial maps of DMN, ECN and FPN
Component (IC)	Modalities contributing >10% to the IC	Behavioral/demographic measure	Spearman correlation coefficient	P-value (FDR corrected)
1	ECN	BMI	-0.284494	0.000299662
1	ECN	Heart rate variability during resting-state scan	0.31414	2.35445e-05
2	ECN	IDS-SR: anxiety/somatic	-0.216256	0.0276068
2	ECN	Brief-A: self-monitoring	-0.257693	0.00196107
2	ECN	BMI	-0.361352	1.57899e-07
2	ECN	Heart rate variability during resting-state scan	0.273624	0.000666406
2	ECN	SF: physical functioning	0.222446	0.0194629
2	ECN	Age	-0.595889	3.84233e-26
3	FPN	Heart rate variability during resting-state scan	0.2142	0.0300213
3	FPN	Age	-0.352476	3.74742e-07
4	FPN	Systolic blood pressure	-0.215912	0.0276068
5	DMN	BMI	-0.242779	0.00554087
5	DMN	Heart rate variability during resting-state scan	0.290849	0.000210481
5	DMN	Age	-0.518848	1.97896e-18
9	FPN	Heart rate variability during resting-state scan	0.234039	0.00984823
9	FPN	Age	-0.441957	2.06618e-12
13	FPN	Age	-0.275126	0.000640069
15	FPN, DMN	BMI	0.267058	0.00101064
20	ECN, FPN, DMN	BMI	0.285019	0.000299662
22	ECN, FPN, DMN	BMI	0.268477	0.000966466
22	ECN, FPN, DMN	Sex	-0.260549	0.00164868
25	FPN, DMN	BMI	0.240728	0.00617204
30	FPN	BMI	-0.24753	0.00400932
30	FPN	Age	-0.227804	0.014323
32	DMN	Units of alcohol consumption in last 7 days	-0.217399	0.0268398
37	FPN, DMN	Sex	0.252999	0.0027223
45	FPN	IDS-SR: anxiety/somatic	-0.21065	0.037076
47	DMN	Brief-A: emotional control	0.222488	0.0194629
48	FPN, DMN	Sex	0.230189	0.012556
